# Supplementary material for: Integrating field, textural, and geochemical monitoring to track eruption triggers and dynamics: a case study from Piton de la Fournaise
Source: Copernicus journal article supplement (doi:10.5194/se-9-431-2018), 2018-04-16
Supplement: Supplementary file 1 [file Table_S1.xls]

## Sheet: Feuil1
Code	Occured	Collected	Texture/Size	Note on sample	Note on location	Longitude	Latitude	El. (m)	TS	Maj	Trace	Isot	Glass	Cry	Gr-s	Com	Mor	Dens	Con	Per	Text	MI
REU140621-1	2014-06-21	2014-06-21	lava	bad quenching in water	Eastern lava front	55°43'32.2"	-21°15'40.3"	1983	X	X	X		X	X
REU140624-1	2014-06-21	2014-06-24	scoria	aphyric; dense and vesicular; glassy	Near the main vent	55°43'10.4"	-21°15'01.6"	2362		X	X
REU140624-3	2014-06-21	2014-06-24	lapilli	hot deposit (405°C)	Main vent (MV)	55°43'10.8"	-21°15'03.8"	2336	XXXX	X	X	Sr-Pb	X	X	X	X	X	X	X	X	XXXX
REU140624-4	2014-06-21	2014-06-24	lapilli	hot deposit (405°C)	MV	55°43'10.8"	-21°15'03.8"	2336
REU140624-6	2014-06-21	2014-06-24	large scoria	aphryic	MV	55°43'10.8"	-21°15'03.8"	2336
REU140624-7	2014-06-21	2014-06-24	bomb	olivine basalt	MV	55°43'10.8"	-21°15'03.8"	2336
REU140624-8	2014-06-21	2014-06-24	lava	fluidal lava	Upper fracture (UF)	55°43'05.6"	-21°14'58.1"	2445
REU140624-9a	2014-06-21	2014-06-24	scoria	medium vesicularity; glassy	Western fracture (WF)	55°42'53.3"	-21°14'58.3"	2518			X				X	X	X	X	X
REU140624-9b	2014-06-21	2014-06-24	scoria	medium vesicularity; glassy	WF	55°42'53.3"	-21°14'58.3"	2445	X	X	X		X	X	X	X	X	X	X	X	X
REU140624-10	2014-06-21	2014-06-24	lava		Western lava flow edge	55°43'30"	-21°15'38"	1958
REU140624-11	2014-06-21	2014-06-24	lava		Western lava flow edge	55°43'30"	-21°15'38"	1958
REU140624-12	2014-06-21	2014-06-24	lava		Eastern lava flow edge	55°43'36"	-21°15'31"	1948	X	X	X	Sr-Pb	X	X				X
REU140624-13	2014-06-21	2014-06-24	scoria		UF	55°43'06"	-21°14'59"	2414	X	X	X	Sr-Pb	X	X			X	X	X		X
REU140624-14	2014-06-21	2014-06-24	lava		Eastern lava flow edge	55°43'36"	-21°15'31"	1948
REU140624-15a	2014-06-21	2014-06-24	on lava	T: 106,7 °C; strong H2S smell	Fumarole	55°43'07.3"	-21°15'00.7"	2408
REU140624-15b	2014-06-21	2014-06-24	on lava	T: 106,7 °C; strong H2S smell	Fumarole	55°43'07.3"	-21°15'00.7"	2408
REU140624-16	2014-06-21	2014-06-24	on lava	T: 174 °C	Fumarole	55°42'53.3"	-21°14'58.3"	2518
REU140624-17a	2014-06-21	2014-06-24	on lava	T: 221 °C (TC); (IR: 305°C)	Fumarole	55°43'01.2"	-21°14'57.5"	2488
REU140624-17b	2014-06-21	2014-06-24	on lava	T: 221 °C (TC); (IR: 305°C)	Fumarole	55°43'01.2"	-21°14'57.5"	2488
REU140624-18	2014-06-21	2014-06-24	on lava	T: 60°C	Fumarole	55°43'05.6"	-21°14'58.1"	2445
REU140624-19a	2014-06-21	2014-06-24	on lava	T: 127°C	Fumarole	55°43'07.5"	-21°15'00.9"	2404
REU140624-19b	2014-06-21	2014-06-24	on lava	T: 171°C	Fumarole	55°43'07.5"	-21°15'00.9"	2404
REU140624-20	2014-06-21	2014-06-24	on lava	T: 102°C	Fumarole	55°42'47.1"	-21°14'58.0"	2496
REU140702-1	2014-06-21	2014-07-02	on lava	T: 117 °C	Fumarole	55.7137	-21.2495	2524
REU140702-2	2014-06-21	2014-07-02	on lava	T: 90 °C	Fumarole	55.7147	-21.2494	2524
REU141118-1	2014-06-21	2014-11-18	scoria	few crystals	MV	55°43'10.8"	-21°15'03.8"	2336
REU141118-2	2014-06-21	2014-11-18	bomb (dense)	more dense	MV	55°43'10.8"	-21°15'03.8"	2336
REU141118-3	2014-06-21	2014-11-18	chosen ligth lapilli		Laterally from the main axis (MV)	55°43'11.2"	-21°15'03.6"	2335	XX				X			X	X	X	X	X	XX
REU141118-4	2014-06-21	2014-11-18	fine lapilli and coarse ash		Laterally from the main axis (MV)	55°43'11.2"	-21°15'03.6"	2335
REU141118-5	2014-06-21	2014-11-18	chosen coarse, dense, lapilli		MV	55°43'10.7"	-21°15'03.7"	2344														X
REU141118-6	2014-06-21	2014-11-18	fine lapilli and coarse ash		MV	55°43'10.7"	-21°15'03.7"	2344							X	X	X
				external pyroclastic limit	Laterally from the main axis (MV)	55°43'12.5"	-21°15'03.2"
													Laterally from the main axis (MV)	55°43'12.5"	-21°15'03.2"
