# Supplementary material for: Integrating field, textural, and geochemical monitoring to track eruption triggers and dynamics: a case study from Piton de la Fournaise
Source: Copernicus journal article supplement (doi:10.5194/se-9-431-2018), 2018-04-16
Supplement: Supplementary file 2 [file se-9-431-2018-supplement.zip]

Archive with 9 entries (8 files):
- se-9-431-2018-supplement-title-page.pdf
- supplement/
- supplement/Table_S6.xlsx
- supplement/Table_S3_corr.xlsx
- supplement/Supplement_explanation_corr.pdf
- supplement/Table_S2.xlsx
- supplement/Table_S1.xls
- supplement/Table_S4.xls
- supplement/Table_S5a_S5b_S5c.xlsx
