# Supplementary material for: Integrating field, textural, and geochemical monitoring to track eruption triggers and dynamics: a case study from Piton de la Fournaise
Source: Copernicus journal article supplement (doi:10.5194/se-9-431-2018), 2018-04-16
Supplement: Supplementary file 2 [file se-9-431-2018-supplement.zip › se-9-431-2018-supplement-title-page.pdf]

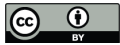

## *Supplement of*

# **Integrating field, textural, and geochemical monitoring to track eruption triggers and dynamics: a case study from Piton de la Fournaise**

**Lucia Gurioli et al.**

*Correspondence to:* Lucia Gurioli ([lucia.gurioli@uca.fr](mailto:lucia.gurioli@uca.fr))

- [se-9-431-2018-supplement-title-page.pdf](#)
- [supplement](#)
  - [Supplement\\_explanation\\_corr.pdf](#)
  - [Table\\_S1.xls](#)
  - [Table\\_S2.xlsx](#)
  - [Table\\_S3\\_corr.xlsx](#)
  - [Table\\_S4.xls](#)
  - [Table\\_S5a\\_S5b\\_S5c.xlsx](#)
  - [Table\\_S6.xlsx](#)

The copyright of individual parts of the supplement might differ from the CC BY 4.0 License.
