# Supplementary material for: Integrating field, textural, and geochemical monitoring to track eruption triggers and dynamics: a case study from Piton de la Fournaise
Source: Copernicus journal article supplement (doi:10.5194/se-9-431-2018), 2018-04-16
Supplement: Supplementary file 2 [file se-9-431-2018-supplement.zip › supplement/Table_S3_corr.xlsx]

## Sheet: Feuil1
Particle name	Type	a (axe)	b(axe)	c(axe)	Weight	Density	Por	V(Pyc)	SD	Conn	Cry	Mplg	µplg	Mcpx	µcpx	k0	k1	k2
		(mm)	(mm)	(mm)	(gr)	(gr/cm3)	(%)	(cm3)	(cm3)	(cm3)	(%)	(%)	(%)	(%)	(%)	(m2)	(m2)	(m2)
REU140624-12-1	Lava					2.15	25.44				100	4	62	2	32
RUE140624-3-1	spiny opaque scoria	57.87	43.03	14.1	14	1.40987	51.0462	4.8657	0.0065	99.9095						2,26x10-10	2,13x10-10	1,15x10-5
REU140624-3-2	spiny opaque scoria	48.38	26.84	24.7	12.95	1.25606	56.3867	4.5	0.0043	99.9403
REU140624-3-3	fluidal scoria	35.71	30.09	29.52	9.68	0.742331	74.2246	3.5812	0.0097	97.7261						1,20x10-10	1,21x10-10	3,21x10-6
REU140624-3-4	spiny glassy scoria	50.82	27.73	27.43	8.79	0.83874	70.8771	3.261	0.0203	97.1874
REU140624-3-5	spiny opaque scoria	40.69	38.19	24.64	17.58	1.52076	47.1958	6.0498	0.0096	100.996	51	3	31	rare	17
REU140624-3-6	spiny glassy scoria	39.66	31.42	19.51	7.05	0.790359	72.557	2.8115	0.0177	94.3823
REU140624-3-7	spiny glassy scoria	36.69	29.07	20.87	7.34	0.889697	69.1077	2.6757	0.018	97.7709
REU140624-3-8	fluidal scoria	37.78	25.67	20.7	3.98	0.566952	80.3142	1.8149	0.0144	92.3208	22	rare	17	rare	4
REU140624-3-9	spiny glassy scoria	44.79	24.2	17.33	5.88	0.827004	71.2846	2.2378	0.024	96.1302
REU140624-3-10	spiny opaque scoria	37	31.41	25.8	16.81	1.40552	51.1973	5.7718	0.0182	101.062
REU140624-3-11	spiny glassy scoria	44.24	28.03	22.14	6.63	0.71521	75.1663	2.5827	0.0258	95.9727
REU140624-3-12	spiny glassy scoria	39.83	26.95	23.15	5.84	0.783893	72.7815	2.1956	0.026	96.9049
REU140624-3-13	spiny glassy scoria	37.87	20.44	30.29	8.99	0.949314	67.0377	3.2583	0.0024	97.8456	49	1	31	4	14
REU140624-3-14	fluidal scoria	34.61	20.68	23.52	3.87	0.555237	80.7209	1.5887	0.0018	95.6463
REU140624-3-15	spiny glassy scoria	32.52	32.09	14.66	3.61	0.722	74.9306	1.3388	0.0007	97.7225
REU140624-3-16	spini glassy scoria	33.1	28.19	15.86	4.99	1.02887	64.2755	1.7487	0.0019	99.4848
REU140624-3-17	fluidal scoria	32.74	22.4	16.4	3.36	0.714894	75.1773	1.4697	0.004	91.4236
REU140624-3-18	fluidal scoria	25.78	22.15	14.12	2.42	0.569412	80.2288	1.177	0.0017	90.1246
REU140624-3-19	fluidal scoria	28.4	21.87	21.79	2.46	0.518987	81.9796	1.0636	0.0017	94.6103
REU140624-3-20	spiny glassy scoria	26.39	23.2	18.76	4.66	1.22955	57.3072	1.788	0.0018	92.1755
REU140624-3-21	spiny glassy scoria	30.17	20.97	16.94	3.53	0.772429	73.1796	1.2878	0.001	98.1429
REU140624-3-22	spiny glassy scoria	28.19	22.24	15.42	4.43	1.11307	61.3519	1.6091	0.0008	97.0962
REU140624-3-23	fluidal scoria	29.48	24.56	19.09	2.14	0.597765	79.2443	0.9086	0.0027	94.1647
REU140624-3-24	fluidal scoria	33.27	21.24	16.2	3.01	0.765903	73.4061	1.1185	0.0015	97.457
REU140624-3-25	fluidal scoria	30.31	25.08	13.92	2.57	0.652284	77.3512	1.0957	0.0006	93.328
REU140624-3-26	spiny glassy scoria	25.44	20.22	13.3	2.88	0.986301	65.7534	1.069	0.003	96.4062
REU140624-3-27	spiny opaque scoria	23.49	22.66	18.4	4.84	1.20398	58.1951	1.6694	0.001	100.477
REU140624-3-28	spiny opaque scoria	28.72	22.3	19.35	5.37	1.25761	56.3329	2.1546	0.0026	87.9432
REU140624-3-29	fluidal scoria	24.05	20.4	14.7	1.95	0.656566	77.2026	0.8369	0.001	93.03
REU140624-3-30	fluidal scoria	26.7	16.17	15.73	1.82	0.541667	81.1921	0.77777	0.0018	94.6546
REU140624-3-31	fluidal scoria	25.37	20.13	14.09	1.9	0.685921	76.1833	0.8346	0.0038	91.713
REU140624-3-32	spiny opaque scoria	28.83	20.22	12.2	3.45	1.31679	54.278	1.2158	0.0024	98.7425
REU140624-3-33	spiny glassy scoria	26.34	21.56	14.7	3.5	1.2069	58.0939	1.2533	0.0042	97.7431
REU140624-3-34	spiny glassy scoria	29.68	21.11	14.44	3.14	0.972136	66.2453	1.14	0.0043	97.6762
REU140624-3-35	spiny glassy scoria	26.79	20.03	18.58	4.03	1.37075	52.4046	1.4124	0.0046	99.1501
REU140624-3-36	spiny glassy scoria	25.53	23.41	15.95	3.22	1.0094	64.9512	1.151	0.006	98.41
REU140624-3-37	spiny glassy scoria	24.63	22.64	14.91	4.26	1.4589	49.3436	1.5073	0.0039	98.0474
REU140624-3-38	fluidal scoria	19.39	22.34	11.4	1.4	0.645161	77.5986	0.6658	0.0042	89.3289
REU140624-3-39	spiny glassy scoria	26.22	20.78	14.27	2.96	0.873156	69.6821	1.1533	0.0036	94.6863
REU140624-3-40	fluidal scoria	24.96	19.04	11.52	1.22	0.685393	76.2016	0.6742	0.0067	81.5253
REU140624-3-41	fluidal scoria	27.95	21.31	14.86	2.89	1.19917	58.3621	1.0286	0.002	98.2135
REU140624-3-42	fluidal scoria	22.53	18.72	17.38	2.26	0.753333	73.8426	1.1822	0.0032	82.0574
REU140624-3-43	fluidal scoria	23.55	16.16	15.04	1.98	0.90411	68.6073	0.7388	0.0042	96.5857
REU140624-3-44	spiny opaque scoria	26.79	19.11	15.74	2.8	1.18143	58.978	1.236	0.006	81.1288
REU140624-3-45	fluidal scoria	24.81	19.08	12.96	1.51	0.616327	78.5998	0.585	0.0042	96.8482
REU140624-3-46	fluidal scoria	16.64	21.76	16.21	1.24	0.596154	79.3002	0.5718	0.0079	91.4368
REU140624-3-47	fluidal scoria	21.67	20.25	14.93	1.41	0.64977	77.4386	0.565	0.0051	95.512
REU140624-3-48	spiny opaque scoria	26.28	18.63	11.99	2.22	1.11558	61.2647	0.8085	0.0037	96.9105
REU140624-3-49	fluidal scoria	27.21	16.81	13.3	1.54	0.641667	77.7199	0.7392	0.0016	89.0377
REU140624-3-50	fluidal scoria	25.73	17.46	15.34	2.46	1.03797	63.9592	1.0879	0.0012	84.5805
REU140624-3-51	fluidal scoria	20.77	17.48	15.51	1.09	0.677019	76.4924	0.6001	0.0017	82.0038
REU140624-3-52	fluidal scoria	19.5	14.36	12.87	0.96	0.623377	78.355	0.4438	0.0022	90.8453
REU140624-3-53	fluidal scoria	27.51	20.34	15.16	1.13	0.412409	85.6803
REU140624-3-54	fluidal scoria	26.2	18.29	13.08	2.23	0.835206	70.9998	0.8164	0.0015	97.7795
REU140624-3-55	fluidal scoria	23.14	16.08	14.03	1.12	0.457143	84.127	0.5134	0.0009	93.959
REU140624-3-56	spiny opaque scoria	22.77	18.14	12.83	2.42	1.16346	59.602	0.8422	0.0013	99.8449
REU140624-3-57	spiny glassy scoria	26.23	14.73	12.39	1.23	0.537118	81.3501	0.6122	0.0017	90.0631
REU140624-3-58	fluidal scoria	22.13	15.59	16.31	1.66	0.779343	72.9395	0.5966	0.0013	98.6991
REU140624-3-59	spiny opaque scoria	26.92	12.65	12.24	2.74	1.37	52.4306	0.9307	0.0023	101.973
REU140624-3-60	fluidal scoria	22.04	13.83	13.13	0.89	0.489011	83.0205	0.5567	0.0014	83.6084
REU140624-3-61	spiny opaque scoria	23.7	20.92	13.23	3.33	1.51364	47.4432
REU140624-3-62	spiny glassy scoria	26.23	17.87	10.39	1.52	0.968153	66.3836	0.5746	0.0014	95.5075
REU140624-3-63	spiny glassy scoria	22.58	16.39	12.38	1.37	0.778409	72.9719	0.6382	0.0011	87.3468
REU140624-3-64	spiny glassy scoria	20.53	16.8	10.05	1.01	0.748148	74.0226	0.4011	0.0031	94.9559
REU140624-3-65	spiny glassy scoria	22.18	15.92	15.64	1.12	0.903226	68.638	0.5255	0.0048	83.9491
REU140624-3-66	spiny glassy scoria	18.35	12.5	11.48	0.72	0.566929	80.315	0.3568	0.0013	89.5294
REU140624-3-67	fluidal scoria	17.71	15.91	13.65	1.02	0.733813	74.5204	0.5922	0.0008	77.0201
REU140624-3-68	fluidal scoria	19.12	15.53	12.9	0.74	0.643478	77.657	0.4091	0.0015	82.9624
REU140624-3-69	spiny glassy scoria	17.72	15.08	11.57	1.23	0.89781	68.826	0.5173	0.0017	90.4322
REU140624-3-70	spiny opaque scoria	20.02	19.03	12.05	1.94	1.43704	50.1029	0.6864	0.0008	98.1092
REU140624-3-71	spiny glassy scoria	16.82	16.1	11.77	1.06	0.921739	67.9952	0.4416	0.0012	90.5947
REU140624-3-72	spiny glassy scoria	20.71	16.3	10.17	1.26	1.38462	51.9231	0.4718	0.0031	92.7407
REU140624-3-73	fluidal scoria	18.82	15.96	9.42	0.78	0.684211	76.2427	0.4973	0.0028	73.9444
REU140624-3-74	spiny glassy scoria	21.16	14.86	12.25	1.99	1.25949	56.2676	0.7108	0.0005	97.7697
REU140624-3-75	spiny glassy scoria	17.02	16.68	12.12	1.16	0.816901	71.6354	0.4315	0.0009	97.1764
REU140624-3-76	spiny opaque scoria	23.34	13.44	8.85	1.47	1.18548	58.8374	0.5311	0.0019	97.165
REU140624-3-77	fluidal scoria	16.81	15.69	11.37	1.41	0.875776	69.5911	0.4716	0.0019	101.605
REU140624-3-78	spiny glassy scoria	17.18	15.21	12.34	1.03	0.730496	74.6355	0.4233	0.0023	93.7606
REU140624-3-79	fluidal scoria	20.49	15.56	11.16	0.76	0.603175	79.0564	0.379	0.0032	88.4439
REU140624-3-80	fluidal scoria	20.98	13.91	13.11	1.22	0.648936	77.4675	0.4899	0.0015	95.4484
REU140624-3-81	fluidal scoria	24.22	17	13.59	1.63	1.11644	61.2348	0.5951	0.0015	96.742
REU140624-3-82	fluidal scoria	22.68	18.14	10.77	0.96	0.623377	78.355	0.5402	0.001	82.8564
REU140624-3-83	fluidal scoria	18.64	13.54	11.25	1.1	0.820896	71.4967	0.4103	0.001	97.0403
REU140624-3-84	spiny glassy scoria	26.37	14.59	12.89	1.53	1.08511	62.3227	0.5398	0.001	99.027
REU140624-3-85	fluidal scoria	18.86	12.65	11.94	0.58	0.47541	83.4927	0.3422	0.0016	86.1762
REU140624-3-86	spiny glassy scoria	20.46	12.17	11	0.63	0.5625	80.4688	0.3488	0.0024	85.57
REU140624-3-87	fluidal scoria	16.91	16.24	10.97	0.71	0.577236	79.9571	0.4358	0.0024	80.7547
REU140624-3-88	fluidal scoria	15.83	14.68	13.17	0.9	0.608108	78.8851	0.4055	0.002	92.0343
REU140624-3-89	fluidal scoria	19.37	14.94	12.67	0.55	0.514019	82.1521	0.3106	0.003	86.3909
REU140624-3-90	fluidal scoria	17.54	13.68	9.28	0.59	0.556604	80.6735	0.2911	0.0007	89.9152
REU140624-3-91	spiny glassy scoria	18.01	14.93	11.54	1.23	1.17143	59.3254	0.4596	0.0008	94.7799
REU140624-3-92	spiny glassy scoria	19.43	16.21	12.73	2.33	1.59589	44.5871	0.8532	0.0012	93.2144
REU140624-3-93	fluidal scoria	18.48	13.1	8.36	0.78	0.75	73.9583
REU140624-3-94	spiny glassy scoria	19.11	14.72	13.72	0.75	0.503356	82.5224
REU140624-3-95	spiny glassy scoria	19.68	15.02	10.86	0.88	0.733333	74.537
REU140624-3-96	spiny glassy scoria	20.77	15.03	6.62	0.69	0.932432	67.6239
REU140624-3-97	fluidal scoria	15.59	13.5	11.45	0.59	0.551402	80.8541
REU140624-3-98	fluidal scoria	14.14	13.09	10.61	0.59	0.508621	82.3396
REU140624-3-99	spiny glassy scoria	17.4	14.88	14.51	1	0.775194	73.0835
REU140624-3-100	fluidal scoria	18.57	12.84	10.62	0.59	0.526786	81.7088
REU140624-3-101	spiny opaque scoria	15.93	11.65	11.45	1.09	0.964602	66.5069
REU140624-3-102	spiny glassy scoria	21.03	12.45	9.96	0.7	0.795455	72.3801
REU140624-3-103	spiny glassy scoria	18.69	13.25	12.08	1.36	1.12397	60.9734
REU140624-9a-1	fluidal scoria	48.37	27.72	23.1	8.41	1.11243	61.3738	4.4072	0.0012	67.9503
REU140624-9a-2	fluidal scoria	41.9	27.79	19.65	9.43	1.07771	62.5794	4.9233	0.0054	69.8852
REU140624-9a-3	fluidal scoria	40.7	31.92	15.69	6.57	1.15061	60.0482	3.5744	0.0072	62.2851
REU140624-9a-4	fluidal scoria	25.92	24.3	21.55	5.36	0.969259	66.3452	2.8367	0.0043	73.4091
REU140624-9a-5	fluidal scoria (broken_a)	18.15	14.81	12.66	1.44	1.09323	62.0407	0.7876	0.0007	64.8067
REU140624-9b-6	fluidal scoria (broken_a)	57.08	45.75	29.68	30.3	0.822922	71.4263	14.5778	0.0105	84.5738
REU140624-9b-7	fluidal scoria	59.46	39.54	33.51	20.06	0.993561	65.5013	10.035	0.0055	76.788
REU140624-9b-8	fluidal scoria (broken_a)	50.04	34.6	27.33	12.79	0.901975	68.6814	6.8403	0.02	75.3638	15	1	11	rare	4
REU140624-9b-9	fluidal scoria	46.7	35.58	18.2	13.95	1.17325	59.262	6.7924	0.0122	72.3449
REU140624-9b-10	fluidal scoria (broken_a)	64.41	30	18.25	13.15	1.17621	59.1595	6.631	0.0246	68.7781
REU140624-9b-11	fluidal scoria	45.85	31.78	19.68	8.16	0.698033	75.7628	4.7217	0.025	78.6786
REU140624-9b-12	fluidal scoria	46.5	29.99	16.83	8.27	0.868697	69.8369	4.6518	0.0312	73.2228
REU140624-9b-13	fluidal scoria	44.92	26.57	24.08	8.21	0.914254	68.2551	4.4354	0.0257	74.1454
REU140624-9b-14	fluidal scoria	54.57	28.44	20.29	8.54	1.04401	63.7497	4.4954	0.038	70.6576
REU140624-9b-15	fluidal scoria	49.45	30.48	18.31	8.48	1.15061	60.0482	4.453	0.0253	65.9126
REU140624-9b-16	fluidal scoria (broken_a)	37.36	35.68	18.1	8.38	1.02071	64.5588	4.4925	0.036	70.1378
REU140624-9b-17	fluidal scoria	36.43	25.3	24.09	6.8	0.984081	65.8305	3.6402	0.0118	71.8813
REU140624-9b-18	fluidal scoria	38.01	27.99	12.77	5.77	1.30543	54.6726	2.8506	0.0071	64.9444
REU140624-9b-19	fluidal scoria	28.31	18.08	16.23	3.69	1.01653	64.7039	2.0495	0.0081	67.2911
REU140624-9b-20	fluidal scoria	25.3	20.01	19.41	3.38	0.971264	66.2755	1.8732	0.0018	69.6673
REU140624-9b-21	fluidal scoria	29.01	22.05	15.32	3.36	0.923077	67.9487	1.9966	0.0057	66.4447
REU140624-9b-22	fluidal scoria	33.37	18.14	15.18	3.48	0.948229	67.0754	1.9887	0.0047	68.2993
REU140624-9b-23	fluidal scoria	25.77	21.01	13.37	2.73	0.982014	65.9023	1.5483	0.0079	67.2295
REU140624-9b-24	fluidal scoria	25.37	12.17	8.04	1.35	1.18421	58.8816	0.7106	0.0059	63.9702
REU140624-9b-25	fluidal scoria	15.26	15.13	10.62	0.49	0.680556	76.3696	0.3266	0.0014	71.5453
REU140624-12-1	lava fragment				135.33	1.7889	37.8855
REU140624-13	whole_fluidal bomb	99.44	54.74	37.86
REU140624-13-a	fluidal bomb_core	90	50	30	46.23	0.742412	74.2218
REU140624-13-b	fluidal bomb_core	40	30	25	15.77	0.669355	76.7585	6.285	0.0127	95.5248	18	1	12	rare	5
REU140624-13-c	fluidal bomb_edge	35	32	25	11.65	1.419	50.7291	5.5578	0.0097	63.6804
REU140624-13-d	fluidal bomb_edge	35	20	15	7.6	1.43667	50.1155	3.6711	0.0075	61.065
REU140624-13-e	fluidal bomb_edge	35	20	12	7.59	1.39522	51.5548	3.6653	0.0031	63.2786
REU141118-3-1	golden pumice	60.19	33.47	27.19	7.14	0.394912	86.2878	3.9192	0.0109	90.7695						2,71x10-10	2,71x10-10	1,66x10-5
REU141118-3-2	golden pumice	46.35	43.26	19.54	9.7	0.964215	66.5203	3.6339	0.0105	96.0274
REU141118-3-3	golden pumice	46.3	35.44	20.03	12.02	0.646237	77.5612	5.2622	0.0136	92.4542						7,07x10-11	7,94x10-11	1,86x10-6
REU141118-3-4	golden pumice	40.36	28.89	21.08	5.14	0.472426	83.5963				7	rare	6	rare	2
REU141118-3-5	golden pumice (broken_a_b)	40.05	31	20	5.95	0.468135	83.7453	2.9306	0.0086	91.8769
REU141118-3-6	golden pumice (broken_a)	37.99	30.85	29.07	6.12	0.582857	79.7619	3.1686	0.0051	87.5391
REU141118-3-7	golden pumice (broken_a_b)	46.78	31	28.59	4.8	0.6	79.1667	2.3814	0.0102	88.7147
REU141118-3-8	golden pumice (broken_a_b)				3.4	0.475524	83.4887				9	rare	7	rare	2
REU141118-3-9	golden pumice	33.99	22.13	15.6	1.96	0.468339	83.7382	0.7533	0.0031	97.9242
REU141118-3-10	golden pumice	28.6	21.16	15.15	1.83	0.512605	82.2012	1.029	0.0014	86.5881
REU141118-3-11	golden pumice	34.75	22.05	20.73	3.01	0.775773	73.0634	1.738	0.0067	75.5593
REU141118-3-12	golden pumice	22.78	19.89	17.91	1.92	0.678445	76.4429	0.8508	0.004	91.4884
REU141118-3-13	golden pumice	30.98	22.28	13.18	1.77	0.531532	81.544	1.0183	0.0039	85.1324
REU141118-3-14	golden pumice	38.31	30.74	8.72	2.5	0.880282	69.4347	1.6727	0.0046	59.1954
REU141118-3-15	golden pumice (broken_a)	34.12	30.71	18.36	4.41	0.719413	75.0204	1.6672	0.0025	97.0438
REU141118-3-16	golden pumice (broken_a)	40.12	24.09	14.12	3.36	0.509091	82.3232	1.7324	0.0024	89.5877
REU141118-3-17	golden pumice (broken_a)	28.42	15.84	13.55	1.7	0.944444	67.2068	0.7188	0.002	89.3759
REU141118-3-18	golden pumice (broken_a)	23.01	15.86	12.25	1.01	0.789062	72.602	0.5939	0.0017	73.8293
REU141118-3-19	golden pumice	50.89	12.25	11.79	2.89	0.914557	68.2445	1.2358	0.0039	89.2268
REU141118-3-20	golden pumice	20.89	15.5	9.35	1.06	0.868852	69.8315	0.62	0.0011	70.4271
REU141118-3-21	golden pumice	55.07	48.1	36.4	24.13	0.752886	73.8581	8.4123	0.001	99.8571
REU141118-3-22	golden pumice	57.29	36.65	21.19	11.56	0.751625	73.9019	4.0927	0.0079	99.3066
REU141118-3-23	golden pumice	45.15	43.52	23.48	10.77	0.811605	71.8193	4.0986	0.0044	96.2329
REU141118-3-24	golden pumice	36.12	26.83	15.72	5.25	0.825472	71.3378	1.8878	0.0059	98.5699
REU141118-3-25	spiny glassy scoria	86.32	51.57	25.82	30.75	1	65.2778	12.379	0.0004	91.5213
REU141118-3-26	spiny glassy scoria	93.37	36.71	25.66	23.15	1	65.2778	8.6944	0.0141	95.6577
REU141118-3-27	spiny glassy scoria	49.92	49.7	37.42	35.01	1	65.2778	12.1967	0.0001	99.823
REU141118-3-28	spiny glassy scoria	55.93	41.58	33.85	27.96	1.34036	53.4596	9.6525	0.0135	100.501						8,03x10-11	3,40x10-11	1,17x10-6
REU141118-3-29	spiny glassy scoria	48.66	26.67	21.72	14.57	1.26366	56.1229	5.0867	0.0094	99.5724
REU141118-3-30	spiny glassy scoria	50.23	31.24	20.74	13.92	1.29008	55.2054	4.8577	0.0074	99.5909
REU141118-3-31	spiny glassy scoria	44.19	32.93	17.84	12.47	1.30303	54.7559	4.3619	0.0026	99.3886
REU141118-3-32	spiny glassy scoria	36.46	28.42	18.29	7.21	1.03443	64.0822	2.562	0.0081	98.6896
REU141118-3-33	spiny glassy scoria	44.63	31.38	24.47	8.74	1.10914	61.4883	3.0816	0.007	99.0325
REU141118-3-34	spiny opaque scoria	28.38	15.55	13.7	3.76	1.70136	40.9251	1.2941	0.0022	101.267
REU141118-3-35	spiny glassy scoria	22.35	17.55	9.5	1.68	1.3601	52.7742	0.5785	0.0015	100.741
REU141118-3-36	spiny glassy scoria	26.19	13.04	12.35	2.1	1.3679	52.5035	0.7258	0.0019	100.418
REU141118-3-37	spiny glassy scoria	23.52	14.33	10.36	1.72	1.34375	53.342	0.5981	0.0018	99.8714
REU141118-3-38	spiny opaque scoria	20.14	10.53	10.51	0.98	1.28947	55.2266	0.3408	0.0002	99.8756
REU141118-3-39	spiny opaque scoria	20.61	10.57	8.45	0.94	1.44615	49.7863	0.3212	0.0016	101.603
REU141118-3-40	spiny glassy scoria	21.88	13.1	8.51	0.94	1.35213	53.0511	0.3235	0.0011	100.783
