# Supplementary material for: Integrating field, textural, and geochemical monitoring to track eruption triggers and dynamics: a case study from Piton de la Fournaise
Source: Copernicus journal article supplement (doi:10.5194/se-9-431-2018), 2018-04-16
Supplement: Supplementary file 2 [file se-9-431-2018-supplement.zip › supplement/Table_S4.xls]

## Sheet: Table X
Sample name REU	140621-1	140624-12	140624-9b-6	140624-13a	141118-5	141118-5-d	141118-5-l	141118-3	140624-1	Sample name REU	140621-1	140624-3				140624-12	140624-13	140624-9a	140624-1
Sample type (occurence)	Lava (early)	Lava (late)	Fluidal lapilli (West fracture)	Fluidal bomb (Upper fracture)	Spiny glassy lapilli (main vent)	Spiny opaque lapilli (main vent)	Fluidal lapilli (main vent)	Golden lapilli (main vent)	Golden lapilli (main vent)	Sample type (occurence)	Lava (early)	Lapilli (main vent)				Lava (late)	Fluidal lapilli (Upper fracture)	Fluidal lapilli (West fracture)	golden lapillis (main vent)
Dissolution	WR	WR	WR	WR	WR	WR	WR	WR	WR	Dissolution	Hand-picked glass	Hand-picked glass	Hand-picked glass	Hand-picked glass	Hand-picked glass	Hand-picked glass	Hand-picked glass	Hand-picked glass	Hand-picked glass	Hand-picked glass
SiO2	48.8185	48.3762	48.8034	48.6155	49.0604	48.6753	48.8499	48.9724	48.914	SiO2
Al2O3	14.0435	14.1623	13.7912	14.2811	14.225	14.3066	14.3257	14.3628	14.119	Al2O3
Fe2O3	12.685	12.6003	12.748	12.6054	12.6673	12.5804	12.68	12.6478	12.545	Fe2O3
MgO	6.68611	6.56424	6.63513	6.60448	6.63124	6.49633	6.48994	6.59099	6.60595	MgO
CaO	11.502	10.9999	11.4843	11.0838	11.2762	11.0871	11.0922	11.1336	11.0361	CaO
Na2O	2.77828	2.74267	2.71084	2.82836	2.75923	2.83717	2.7216	2.77897	2.74998	Na2O
K2O	0.720011	0.735581	0.708413	0.741728	0.833313	0.749926	0.731996	0.736143	0.833026	K2O
TiO2	2.82326	2.80525	2.82993	2.80832	2.82431	2.83313	2.83887	2.84109	2.79625	TiO2
MnO	0.177663	0.172601	0.177845	0.173108	0.178816	0.171452	0.173014	0.17344	0.175281	MnO
P2O5	0.339475	0.345916	0.335693	0.380658	0.354752	0.376523	0.372427	0.37205	0.345064	P2O5
H2O+	0	0	0.05	-0.39	0.04	-0.02	-0.03	-0.44	-0.05	H2O+
H2O-	-0.26	-0.32	-0.63	-0.2	-0.75	-0.45	-0.63	-0.39	-0.85	H2O-
Total	100.368	99.2353	99.6974	99.5837	100.101	99.6948	99.6666	99.8302	99.2197	Total
Li	5.99568	6.26675	6.23774	6.37605	5.81638	6.26793	5.45614	5.44734	5.87209	Li	5.64826	6.13179	6.46773	5.71295	5.89679	5.6592	5.94919	5.98036	5.9645	6.16667
Be	1.07872	1.0842	1.12529	1.08504	1.02851	1.08741	1.07184	1.01668	1.0447	Be	1.03373	1.06598	1.10779	1.00184	1.06166	1.08473	1.07269	1.11064	1.07747	1.08615
Sc	32.5278	34.7805	33.915	34.5473	31.2909	34.1738	31.5761	29.2042	32.2397	Sc	32.4846	32.4775	34.5041	30.5846	31.823	30.7815	32.8368	31.4468	32.7526	32.5038
Ti	17284.4	18062.4	18021.3	17787	16170	17852	17824.8	16381.2	16534.2	Ti	15902.7	17284.4	18098.6	16433	16552.9	16834.7	16881.5	16461.2	17022.7	17045.5
V	316.621	340.027	327.173	336.665	306.232	337.118	336.794	308.85	311.421	V	304.976	326.775	338.971	311.657	310.788	318.232	318.032	309.519	320.326	321.308
Cr	74.7001	86.907	72.2891	84.2356	71.2687	76.485	77.0555	73.2582	86.623	Cr	95.7453	58.2983	59.0983	54.5133	83.0135	56.6871	57.8714	54.1074	58.9356	56.421
Co	45.3172	48.7272	46.3661	48.4114	44.038	47.7348	47.452	45.0713	45.1705	Co	43.0642	45.267	47.0308	43.2896	51.6609	44.0765	44.6109	43.2829	44.7174	44.5088
Ni	83.0285	91.6416	80.3638	89.2772	79.2471	85.4012	84.9344	87.0665	84.5383	Ni	72.6362	69.9916	72.9218	65.9736	171.136	68.1237	68.6184	66.7354	69.8395	68.0303
Cu	106.048	112.943	110.6	113.36	103.298	112.124	109.362	102.888	105.587	Cu	100.539	111.656	115.204	105.649	105.312	106.315	108.515	105.803	110.936	108.522
Zn	102.999	113.256	106.181	113.78	89.4515	115.532	109.265	104.431	90.7622	Zn	103.386	110.849	117.701	111.672	109.039	105.157	108.208	107.484	94.0886	93.4209
Ga	23.0578	24.3007	23.5457	24.1051	22.3601	23.9865	23.9085	22.1388	22.6882	Ga	22.105	23.4143	24.5411	22.5205	22.0884	22.3356	22.8026	22.6622	22.958	23.2207
Ge	1.63569	1.79107	1.73038	1.74901	1.63683	1.76571	1.75624	1.65245	1.66231	Ge	1.55988	1.7216	1.81464	1.63779	1.73376	1.66912	1.67381	1.60692	1.68202	1.68648
As	0.81351	0.835922	0.803508	0.847967	0.753995	0.854103	0.903899	0.801823	0.853444	As	0.789556	0.859227	0.905442	0.821692	0.779654	0.75909	0.743186	0.784769	0.802882	0.855627
Rb	17.7364	18.5661	18.274	18.4216	17.6576	18.6446	16.434	16.3541	17.7579	Rb	17.0573	18.2022	18.8728	17.9384	17.2615	16.9338	17.9909	17.7411	18.2129	18.3428
Sr	362.819	374.55	372.755	375.174	356.849	376.402	361.205	349.754	360.207	Sr	357.938	373.067	382.722	366.259	350.991	352.883	362.991	362.144	359.406	367.619
Y	29.3033	30.0994	30.0579	30.1664	29.0285	30.2296	29.6918	28.6582	29.0541	Y	28.4214	30.1387	30.6914	29.4517	28.4298	28.2322	29.4075	29.2543	29.8424	29.7447
Zr	197.208	204.725	202.395	205.047	196.33	205.936	204.875	197.701	197.255	Zr	193.546	205.112	209.387	202.244	192.919	196.162	198.998	201.861	203.934	201.053
Nb	22.732	23.1958	23.2784	23.2446	22.3068	23.3764	23.3041	22.2597	22.4203	Nb	21.683	23.2207	23.6934	22.7135	21.9752	22.4545	22.6136	22.7133	22.9158	23.0195
Cs	0.248052	0.285238	0.247724	0.275791	0.244816	0.286231	0.240248	0.240806	0.248158	Cs	0.264446	0.272111	0.284397	0.28386	0.254881	0.247722	0.264792	0.274384	0.253551	0.250714
Ba	138.671	141.585	141.458	141.884	138.114	143.029	141.063	137.623	138.075	Ba	133.934	142.954	144.363	142.16	134.392	136.28	139.025	138.738	141.756	141.648
La	19.9873	20.2574	20.3043	20.316	19.9023	20.3989	20.1728	19.8748	19.9221	La	19.0579	20.474	20.7136	20.408	19.1485	19.3969	19.8051	19.8947	20.2971	20.3414
Ce	49.314	48.6844	49.8188	48.7531	45.0576	48.6716	48.914	48.452	45.1001	Ce	44.1993	49.3255	49.9776	49.5947	43.3797	42.346	45.0721	45.858	46.5337	46.1294
Pr	6.05775	6.17372	6.14851	6.16588	6.06417	6.16561	6.1852	6.02988	6.0666	Pr	5.89583	6.22132	6.28298	6.21315	5.84948	5.92812	6.11956	6.12883	6.16544	6.1894
Nd	26.8694	27.0554	27.3226	27.053	26.7608	26.9833	27.0368	26.529	26.6839	Nd	25.7972	27.2516	27.4717	27.2032	25.7196	25.9834	26.808	26.9904	27.1739	27.1815
Sm	6.45499	6.53546	6.5461	6.5202	6.39203	6.55118	6.4546	6.33947	6.43185	Sm	6.25965	6.56974	6.58522	6.52059	6.22316	6.2672	6.47002	6.54641	6.57582	6.49063
Eu	2.19196	2.17969	2.21758	2.15213	2.18627	2.18373	2.18396	2.15333	2.17291	Eu	2.11828	2.21261	2.22881	2.22484	2.07112	2.07969	2.16677	2.1847	2.20777	2.21254
Tb	1.00455	1.0136	1.00695	0.99973	1.00306	1.01086	0.995767	0.997592	0.989888	Tb	0.974296	1.01578	1.02436	1.02985	0.951292	0.965385	0.98956	1.00563	1.02538	1.01284
Gd	6.78542	6.78777	6.87896	6.7625	6.76666	6.73306	6.64621	6.69653	6.73001	Gd	6.56511	6.85548	6.84183	6.89144	6.40583	6.42707	6.65383	6.82543	6.88418	6.83879
Dy	5.90899	5.89033	5.96168	5.91447	5.87577	5.86912	5.8078	5.8603	5.87558	Dy	5.74054	5.97751	5.95868	6.01646	5.57889	5.60957	5.79508	5.9166	5.94242	5.9256
Ho	1.09426	1.09633	1.10218	1.09662	1.10086	1.09913	1.09316	1.08574	1.07902	Ho	1.06648	1.11157	1.11474	1.12331	1.04421	1.04953	1.08706	1.10791	1.11373	1.10205
Er	2.85588	2.8795	2.88958	2.89753	2.86895	2.88013	2.8701	2.8582	2.87823	Er	2.78476	2.96499	2.94081	2.92685	2.71452	2.73633	2.80769	2.86591	2.90204	2.91327
Tm	0.362232	0.375103	0.370051	0.37157	0.375349	0.372859	0.369637	0.370964	0.375521	Tm	0.36888	0.378736	0.382631	0.386209	0.360924	0.358354	0.380403	0.371753	0.383097	0.383735
Yb	2.31717	2.29058	2.3241	2.30398	2.32868	2.29555	2.26121	2.30931	2.30772	Yb	2.26382	2.36815	2.32785	2.38081	2.17763	2.21967	2.27348	2.32831	2.37107	2.34711
Lu	0.316305	0.318077	0.31941	0.320243	0.3158	0.32134	0.316003	0.328598	0.315381	Lu	0.30338	0.332523	0.327485	0.332282	0.297713	0.298932	0.315999	0.315071	0.321771	0.316428
Hf	4.85322	4.85844	4.91414	4.82089	4.84743	4.87244	4.84961	4.88151	4.81281	Hf	4.69697	4.99019	4.97068	4.98734	4.60144	4.71354	4.82187	4.92776	4.93802	4.87421
Ta	1.42622	1.42175	1.44408	1.42536	1.43792	1.42566	1.41892	1.42683	1.41829	Ta	1.38184	1.45394	1.45111	1.46701	1.35401	1.40152	1.40753	1.45617	1.44235	1.44141
W	0.306999	0.288895	0.295193	0.284146	0.301474	0.29549	0.283689	0.286871	0.300692	W	0.269105	0.292929	0.289708	0.290736	0.2765	0.273915	0.279431	0.283411	0.30121	0.295582
Tl	0.0392518	0.0492004	0.045715	0.0488243	0.0433322	0.0449302	0.0502657	0.0616198	0.0743159	Tl	0.0354489	0.176956	0.203038	0.0751124	0.0975605	0.0342668	0.0427702	0.0452324	0.0771684	0.0528014
Pb	1.48562	1.74666	1.47145	1.68918	1.45367	2.72454	1.74576	1.74658	1.50933	Pb	1.51916	1.84737	1.88055	1.81803	1.51905	1.52219	1.48342	1.56962	1.47604	1.4889
Bi	0.0214951	0.0156123	0.020889	0.0153568	0.0183219	0.0657932	0.0326245	0.0232515	0.0285103	Bi	0.0202722	0.0279664	0.0519916	0.028171	0.0348467	0.0145232	0.0390871	0.0187808	0.0196563	0.0214853
Th	2.2481	2.28688	2.25606	2.26716	2.29703	2.2898	2.22093	2.31038	2.26693	Th	2.2221	2.34674	2.3216	2.38102	2.14436	2.17007	2.23989	2.34304	2.31367	2.31737
U	0.559983	0.552879	0.564161	0.550115	0.566233	0.557986	0.550512	0.57617	0.556253	U	0.549279	0.574584	0.566848	0.573291	0.540703	0.55052	0.554236	0.565666	0.575416	0.565037
Major element concentrations are in wt. %. Trace element concentration are in mg/g (ppm)
WR: whole rock analysis on powder
