# Supplementary material for: Integrating field, textural, and geochemical monitoring to track eruption triggers and dynamics: a case study from Piton de la Fournaise
Source: Copernicus journal article supplement (doi:10.5194/se-9-431-2018), 2018-04-16
Supplement: Supplementary file 2 [file se-9-431-2018-supplement.zip › supplement/Table_S5a_S5b_S5c.xlsx]

## Sheet: TableS5a
	Sample Type	Spiny opaque (Main Vent - proximal)																					Fluidal (Main Vent - proximal)								Spiny glassy (Main Vent - proximal)													Golden (Main Vent - proximal)
	DataSet/Point (i)	1 / 1 .	2 / 1 .	3 / 1 .	4 / 1 .	5 / 1 .	6 / 1 .	7 / 1 .	8 / 1 .	9 / 1 .	10 / 1 .	21 / 1 .	22 / 1 .	23 / 1 .	24 / 1 .	25 / 1 .	26 / 1 .	27 / 1 .	28 / 1 .	29 / 1 .	30 / 1 .	31 / 1 .	32 / 1 .	33 / 1 .	34 / 1 .	35 / 1 .	36 / 1 .	37 / 1 .	40 / 1 .	41 / 1 .	49 / 1 .	52 / 1 .	53 / 1 .	54 / 1 .	55 / 1 .	56 / 1 .	57 / 1 .	58 / 1 .	59 / 1 .	60 / 1 .	61 / 1 .	62 / 1 .	63 / 1 .	26 / 1 .	27 / 1 .	28 / 1 .	29 / 1 .	30 / 1 .	31 / 1 .
	Phase	Clinopyroxene	Clinopyroxene	Clinopyroxene	Clinopyroxene	Plagioclase	Plagioclase	Olivine	Olivine	Olivine	Olivine	Plagioclase	Plagioclase	Plagioclase	Clinopyroxene	Clinopyroxene	Clinopyroxene	Clinopyroxene	Olivine	Olivine	Olivine	Olivine	Plagioclase	Plagioclase	Clinopyroxene	Clinopyroxene	Clinopyroxene	Clinopyroxene	Clinopyroxene	Clinopyroxene	Olivine	Olivine	Olivine	Plagioclase	Plagioclase	Plagioclase	Plagioclase	Clinopyroxene	Clinopyroxene	Clinopyroxene	Clinopyroxene	Olivine	Olivine	Plagioclase	Plagioclase	Plagioclase	Olivine	Olivine	Olivine
	Size					Microcryst	Microcryst																		Microcryst	Microcryst					Macrocryst													Microcryst	Microcryst	Microcryst	Microcryst
	Zone	Core	Rim	Core	Rim			Core	Rim	Core	Rim				Core	Rim	Core	Rim	Core	Rim	Core	Rim			Core	Rim	Core	Rim	Core	Rim	Core	Core	Rim	Core	Rim	Core	Rim	Core	Rim	Core	Rim	Core	Rim
	SiO2	47.1206	48.5516	48.559	48.8091	51.1221	52.2213	38.1311	37.5369	38.6759	38.2645	49.8328	47.9176	52.8231	48.7597	47.6761	51.578	52.0387	38.4771	37.8069	39.0395	38.2571	51.9124	51.5338	50.1701	49.9213	47.778	49.0632	48.7177	49.1599	39.8315	38.6214	38.1284	51.9494	52.2616	48.5472	51.6294	50.7278	49.4888	47.6186	48.8384	38.0254	37.2596	51.5033	52.0771	52.279	38.6166	38.5743	39.2305
	Al2O3	6.0842	4.7625	5.2237	4.6728	29.2658	29.157	0.0218	0.0576	0.0513	0.0617	30.5267	31.7987	29.41	4.8837	7.345	2.5026	1.697	0.0429	0.0609	0.0183	0.0157	29.4276	29.7163	3.2488	5.0815	6.3141	4.6684	5.4279	4.6932	0.0607	0.0658	0.0262	29.4061	29.4918	30.9449	29.309	3.4917	4.113	5.9135	4.5452	0.0396	0.0587	29.5933	29.3571	29.1006	0.0231	0.0609	0.0541
	TiO2	2.8386	2.4205	2.1553	2.2698	0.1363	0.1225	0.0608	0.1113	0.071	0.0699	0.071	0.0529	0.1752	2.1624	3.8397	1.2351	1.1746	0.0836	0.134	0.0869	0.0447	0.1244	0.1296	1.3351	2.0986	2.6989	2.4783	1.9676	1.8826	0.0283	0.0561	0.0968	0.1274	0.1339	0.059	0.1141	1.3661	2.0896	2.6839	2.0332	0.0592	0.093	0.1179	0.1109	0.1171	0.0651	0.0631	0.0632
	CaO	20.7757	19.347	20.4458	19.8393	13.3726	13.3521	0.3456	0.4196	0.3065	0.3796	14.8908	16.0462	13.0156	20.7446	17.1126	19.7644	17.4648	0.3844	0.4452	0.3848	0.455	13.0543	13.9684	19.9535	20.6487	20.0263	20.0442	20.0839	19.8896	0.2853	0.3248	0.3564	13.259	13.1884	15.4079	13.2155	16.8098	20.2712	19.4172	20.5291	0.3324	0.432	13.5474	13.6116	13.3426	0.3767	0.3277	0.385
	Na2O	0.3032	0.2833	0.2703	0.2617	3.7594	3.7072	0	0	0.0303	0.0134	2.9779	2.2869	3.8269	0.2687	0.6236	0.2178	0.1755	0	0	0.0244	0.0168	3.8465	3.4973	0.2252	0.274	0.3583	0.2817	0.3872	0.2724	0.0273	0	0	3.6893	3.8998	2.5553	3.8364	0.166	0.3504	0.451	0.2476	0.0081	0.0273	3.4811	3.7019	3.7059	0.0363	0	0
	K2O	0.0022	0.0096	0	0.0222	0.1704	0.1486	0	0.0102	0.0155	0.0109	0.113	0.0895	0.2003	0.0193	0.2867	0.0003	0.0081	0.002	0.0102	0.0109	0.0122	0.1962	0.167	0.0084	0.0133	0	0.0155	0.0048	0.0029	0	0.0017	0	0.1801	0.1692	0.1021	0.1876	0.0075	0.0055	0.0467	0	0	0.001	0.1491	0.1793	0.1692	0.0038	0.0043	0.0082
	MnO	0.063	0.2266	0.193	0.2374	0	0.0498	0.3944	0.352	0.3076	0.3724	0	0.009	0	0.1722	0.2485	0.2142	0.2817	0.2915	0.3444	0.3694	0.4019	0	0.0186	0.112	0.1381	0.215	0.2161	0.158	0.185	0.2075	0.2803	0.3376	0.0366	0.022	0	0.0361	0.1806	0.1834	0.1346	0.1853	0.2279	0.3455	0	0.0157	0.0377	0.3238	0.2978	0.2776
	MgO	13.8359	14.5314	14.735	14.5374	0.2275	0.2114	39.1088	35.4871	40.3166	36.0369	0.1958	0.1649	0.239	14.4403	11.6723	16.6739	17.1652	39.2192	36.3073	39.1986	36.5874	0.2105	0.2325	15.8603	15.1168	14.0045	14.5034	14.7215	15.2358	45.0384	40.5279	37.9279	0.1946	0.2325	0.1793	0.25	17.6179	14.7435	13.7472	14.666	39.6848	35.2783	0.2529	0.2834	0.3077	39.3048	40.3664	39.6455
	FeO	8.4048	9.1218	7.908	8.8805	0.9062	0.7686	20.6704	25.3056	20.4391	25.0752	0.7147	0.6574	0.9949	8.26	11.77	8.3391	9.7664	21.5986	24.7131	22.4664	25.6411	0.6675	0.8907	7.4005	7.5511	8.3199	9.0505	8.5155	7.6529	14.8144	19.9248	22.8904	0.9095	0.9675	0.6837	0.8347	9.2711	8.5691	9.0132	7.9939	20.7851	26.2506	0.9346	1.0843	1.1096	20.3968	19.6336	20.5866
	Cr2O3	0.167	0.0513	0.2234	0.1176	0.005	0.0056	0.0246	0	0.0029	0.0158	0.0056	0	0	0.1355	0.0295	0.1019	0.0417	0	0	0	0.0136	0	0	0.1025	0.2045	0.1097	0.0735	0.1052	0.0814	0.0271	0	0	0	0	0.0281	0.0031	0.0909	0.0367	0.0799	0.0821	0	0.0209	0	0.0129	0.0306	0.0366	0.0173	0
	NiO
	P2O5
	Total	99.5952	99.3057	99.7135	99.6478	98.9651	99.744	98.7575	99.2805	100.217	100.3	99.3283	99.0232	100.685	99.8464	100.604	100.627	99.8136	100.099	99.8221	101.599	101.445	99.4394	100.154	98.4163	101.048	99.8247	100.395	100.089	99.0555	100.321	99.8028	99.7637	99.7519	100.367	98.5076	99.4161	99.7293	99.8511	99.1058	99.1208	99.1625	99.7669	99.5796	100.434	100.2	99.1835	99.3454	100.251
	XFo							0.767488	0.709891	0.775219	0.715284								0.759826	0.719019	0.752622	0.713156									0.840945	0.780244	0.743254									0.772848	0.705434				0.770355	0.781995	0.770191
	XEn	0.41314	0.432995	0.435011	0.430294										0.424835	0.381688	0.468847	0.487613							0.461602	0.44201	0.423458	0.426652	0.433752	0.450358								0.504719	0.432023	0.419562	0.432475
	XWo	0.446024	0.414478	0.433977	0.4222										0.438795	0.402328	0.399568	0.356699							0.41753	0.434088	0.435368	0.423941	0.425451	0.422699								0.346235	0.427069	0.42607	0.435243
	XFs	0.140835	0.152528	0.131012	0.147506										0.13637	0.215984	0.131585	0.155688							0.120868	0.123902	0.141174	0.149407	0.140797	0.126944								0.149046	0.140908	0.154367	0.132282
	XAn					0.656216	0.659773					0.72944	0.790802	0.645004									0.644709	0.681525										0.658033	0.645011	0.76453	0.648421							0.676552	0.663208	0.658891
	XAb					0.333828	0.331484					0.26397	0.203946	0.343177									0.343754	0.308774										0.331324	0.345136	0.229438	0.34062							0.314582	0.32639	0.331161
	XOr					0.00995607	0.0087428					0.00659078	0.00525177	0.0118186									0.0115371	0.00970149										0.0106424	0.00985287	0.00603204	0.0109596							0.00886564	0.0104018	0.00994856
[truncated: 25 more columns]

## Sheet: TableS5b
	Publication	Di Muro et al. (2015)																								This study
	Eruption	April 2007	April 2007	September 2008	September 2008	September 2008	September 2008	September 2008	September 2008	September 2008	September 2008	September 2008	September 2008	September 2008	September 2008	September 2008	September 2008	September 2008	November 2008	November 2008	November 2008	November 2008	November 2008	December 2008	December 2008	December 2009	December 2009	December 2009	December 2009	December 2009	December 2009	December 2009	December 2009	January 2010	January 2010	January 2010	January 2010	January 2010	January 2010	January 2010	January 2010	January 2010	January 2010	October 2010	October 2010	October 2010	June 2014	June 2014	June 2014
	Label Plagioclase	051-pl60m-2-r	051-p60m-3-r	drap-pl1	drap-pl1	drap-pl2	drap-pl5	drap-pl5	drap-pl1	2203-pigna2-pl1	2203-pigna2-pl2	211-cap1-pl1	211-cap3-pl1	211-cap3-pl1-rim	211-cap4-pl1	211-cap4-pl1	2201-cp2-pl1	2201-cp2-pl2	271-ch7-pl1-r	271-ch6-pl1-r	271-tear-pl250-r	271-chn2-pl1-2	271-tear2-aggreg	19-X	19 6	PL1	PL13	PL16	PL12	PL21	PL33	PL34	PL40	MICROLITE	PL9	PL29	PL29	PL32	PL32	PL26	PL26	PL38	PL38	PL11	PL11	PLX	REU140624-3-5 zone1 plagio 1 micro	REU140624-3-5 zone1 plagio 2 micro	REU140624-3-5 zone2 plagio 1
	Zone	Rim	Rim	Rim	Rim	Rim	Rim	Rim	Rim	Rim	Rim	Rim	Rim	Rim	Rim	Rim	Rim	Rim	Rim	Rim	Rim			Rim	Rim	Rim	Rim	Rim	Rim	Rim	Rim	Rim	Rim	Microlith	Rim	Rim	Rim	Rim	Rim	Rim	Rim	Rim	Rim	Rim	Rim	Rim	Microlith	Microlith
	SiO2	51.057	51.186	50.211	49.648	51.176	49.874	50.16	49.446	51.388	48.151	48.449	49.901	49.189	49.767	49.342	49.795	49.022	50.949	50.507	50.273	51.445	48.796	51.659	52.376	50.0816	50.0011	50.4637	49.3785	49.6425	50.2696	49.0879	49.3555	52.2473	50.794	50.0371	49.8521	50.4066	50.2393	49.0781	50.9589	50.0348	50.1275	49.0683	49.457	49.0338	51.1221	52.2213	49.8328
	TiO2																																														0.1363	0.1225	0.071
	Al2O3	30.018	29.375	31.388	31.392	30.548	31.239	31.384	31.575	30.078	32.309	32.362	31.339	31.901	31.116	31.838	31.384	31.844	30.327	30.801	31.221	30.045	32.219	30.216	29.454	31.6126	32.3275	32.0212	31.8956	31.2843	31.7862	32.4077	31.836	29.9927	31.2299	31.5376	31.7698	31.0273	31.5714	31.7869	31.2946	30.9367	31.3415	32.2847	31.9448	31.7417	29.2658	29.157	30.5267
	FeO	0.72	1.005	0.547	0.722	0.76	0.564	0.682	0.74	0.677	0.747	0.712	0.556	0.65	0.729	0.754	0.731	0.753	0.701	0.824	0.575	0.709	0.655	0.939	0.994	0.489	0.559	0.6968	0.5443	0.6424	0.7317	0.6604	0.5772	0.9098	0.6989	0.625	0.668	0.6722	0.5962	0.6692	0.5484	0.6208	0.7515	0.7	0.5957	0.7261	0.9062	0.7686	0.7147
	MnO																																														0	0.0498	0
	MgO	0.222	0.181	0.178	0.196	0.194	0.189	0.194	0.189	0.241	0.188	0.16	0.192	0.164	0.206	0.196	0.17	0.181	0.206	0.202	0.196	0.229	0.177	0.194	0.323																						0.2275	0.2114	0.1958
	CaO	13.36	12.779	14.744	15.06	13.847	14.805	14.61	15.046	13.79	15.669	15.806	14.736	15.261	14.978	15.371	14.747	15.593	13.414	14.258	13.935	12.61	15.193	13.513	12.949	15.3501	15.5959	15.1253	15.6032	15.391	15.1256	16.1066	15.6866	13.5381	14.6494	15.6035	15.1826	14.6524	14.9769	15.7051	14.9025	14.7359	14.9826	16.1094	16.0993	15.4691	13.3726	13.3521	14.8908
	Na2O	3.539	3.69	3.082	2.924	3.273	2.959	2.979	2.891	3.471	2.413	2.394	3.049	2.653	2.918	2.766	3.06	2.692	3.679	3.174	3.286	3.985	2.584	3.418	3.567	2.8891	2.5676	2.8957	2.6378	2.5706	2.8742	2.4073	2.5486	3.6591	3.1283	2.8336	2.7018	3.0654	2.8591	2.5206	3.1083	3.0586	3.0359	2.4782	2.6176	2.579	3.7594	3.7072	2.9779
	K2O	0.161	0.206	0.113	0.086	0.14	0.11	0.087	0.095	0.18	0.066	0.067	0.105	0.075	0.08	0.094	0.123	0.095	0.116	0.118	0.138	0.195	0.06	0.142	0.177	0.0967	0.0975	0.1149	0.1114	0.1012	0.1201	0.1114	0.1232	0.182	0.114	0.1028	0.1119	0.1169	0.1125	0.0876	0.1117	0.1263	0.1439	0.0709	0.1022	0.1145	0.1704	0.1486	0.113
	Total	99.077	98.422	100.263	100.028	99.938	99.74	100.096	99.982	99.825	99.543	99.95	99.878	99.893	99.794	100.361	100.01	100.18	99.392	99.884	99.624	99.218	99.684	100.081	99.84	100.519	101.149	101.318	100.171	99.632	100.907	100.781	100.127	100.529	100.614	100.74	100.286	99.9408	100.355	99.8475	100.924	99.5131	100.383	100.712	100.817	99.6642	98.9603	99.7385	99.3227
	An	66.9475	64.8622	72.0774	73.6297	69.4553	72.9647	72.6705	73.7885	67.9796	77.9002	78.1779	72.3114	75.7324	73.5885	75.0232	72.18	75.7766	66.3741	70.7866	69.5161	62.8818	76.1917	68.0161	66.017	74.1839	76.6116	73.779	76.0835	76.3365	73.8972	78.2086	76.7292	66.4457	71.6541	74.8289	75.1474	72.047	73.8384	77.1012	72.1363	72.1651	72.5678	77.9092	76.8222	76.3107	65.6216	65.9773	72.944
	Ab	32.0919	33.8928	27.2648	25.8697	29.7086	26.3898	26.8142	25.6568	30.9639	21.7091	21.4275	27.0751	23.8244	25.9435	24.4305	27.1032	23.6737	32.9425	28.5158	29.6642	35.9604	23.45	31.1328	32.9086	25.2585	22.817	25.5522	23.2683	23.0646	25.4026	21.146	22.5517	32.4885	27.6806	24.5829	24.1917	27.2672	25.4998	22.3857	27.2185	27.0969	26.6006	21.6816	22.5959	23.0154	33.3828	33.1484	26.397
	Or	0.960597	1.24494	0.657733	0.500626	0.836113	0.645482	0.515246	0.554726	1.05651	0.390687	0.39457	0.613484	0.443146	0.467987	0.546272	0.716812	0.549688	0.683416	0.697528	0.819681	1.15779	0.358264	0.851012	1.07443	0.557616	0.571477	0.668743	0.648145	0.598902	0.700114	0.645425	0.71904	1.06584	0.665328	0.588235	0.660858	0.685854	0.661795	0.513138	0.645146	0.738013	0.831626	0.409134	0.58189	0.673963	0.995607	0.87428	0.659078
	Label Glass	051-matr5	051-matr5	drap-pl2	drap-pl2	drap-pl2	drap-pl2	drap-pl2	22drap-spugna a	220-pigna a	220-pigna a	211_01a	211_01a	211_01a	211_01a	211_01a	AV 2201	AV 2201	271-ch7-matr5	MICROplag	271-tear-pl250-matr	271-chn2-matr2	271-ch4-pl2-cpx1	19-1 3a	19-1 2a	this study	this study	this study	this study	this study	this study	this study	this study	this study	this study	this study	this study	this study	this study	this study	this study	this study	this study	this study	this study	this study	this study	this study	this study
	Number of analysis	4	4	1	1	1	1	1	3	3	3	3	3	3	3	3	8	8	3	4	1	1	1	4	5	1	3	1	1	3	1	2	1	3	1	1	1	3	3	1	1	1	1	1	1	1	5	5	5
	SiO2	50.3901	50.3901	50.1724	50.1724	50.1724	50.1724	50.1724	50.5586	50.8545	50.8545	50.0963	50.0963	50.0963	50.0963	50.0963	49.9912	49.9912	50.6802	50.197	50.5478	50.6185	50.286	50.1878	50.4458	50.2072	49.9682	49.6634	50.0323	49.9682	50.4146	50.3461	50.2768	49.9682	50.5696	51.0365	51.0365	50.5884	50.5884	49.9475	50.785	50.3865	50.3865	50.0267	50.0267	50.0267	49.7531	49.7482	49.7482
	TiO2	2.93884	2.93884	3.19382	3.19382	3.19382	3.19382	3.19382	3.08554	3.18206	3.18206	3.20108	3.20108	3.20108	3.20108	3.20108	3.27835	3.27835	3.19205	3.14446	2.98535	3.02652	3.1252	3.27554	3.25529	3.03953	2.97022	2.80421	3.06587	2.97022	2.923	2.98718	3.05208	2.97022	3.01419	3.21608	3.21608	3.17216	3.17216	3.18979	3.11096	3.08949	3.08949	3.57211	3.57211	3.57211	4.25504	4.2506	4.2506
	Al2O3	14.3534	14.3534	14.5349	14.5349	14.5349	14.5349	14.5349	14.2395	14.265	14.265	14.477	14.477	14.477	14.477	14.477	14.429	14.429	14.0751	14.4243	14.6049	14.3105	14.4009	13.9948	13.9983	13.8559	14.074	14.4047	13.9635	14.074	14.2995	14.2192	14.138	14.074	14.2149	14.2606	14.2606	14.108	14.108	13.7872	14.2777	14.239	14.239	13.0446	13.0446	13.0446	12.5301	12.5302	12.5302
	FeO	10.5677	10.5677	10.8152	10.8152	10.8152	10.8152	10.8152	10.876	10.5625	10.5625	10.6134	10.6134	10.6134	10.6134	10.6134	10.9745	10.9745	10.7674	10.8669	10.6877	11.1199	10.8081	11.133	11.0158	12.042	11.9619	12.0575	11.7871	11.9619	11.6457	11.7165	11.7881	11.9619	11.6689	11.5363	11.5363	11.7933	11.7933	12.0073	11.8341	11.5251	11.5251	13.1864	13.1864	13.1864	14.4036	14.4037	14.4037
	MnO	0.151508	0.151508	0.144434	0.144434	0.144434	0.144434	0.144434	0.208913	0.137418	0.137418	0.210817	0.210817	0.210817	0.210817	0.210817	0.188001	0.188001	0.194424	0.224577	0.147878	0.156925	0.169291	0.109162	0.218177	0.174696	0.175866	0.143216	0.209457	0.175866	0.159785	0.180624	0.201699	0.175866	0.176492	0.155892	0.155892	0.146547	0.146547	0.131637	0.152191	0.205784	0.205784	0.219472	0.219472	0.219472	0.228006	0.231668	0.231668
	MgO	6.45438	6.45438	6.14759	6.14759	6.14759	6.14759	6.14759	6.30044	6.25409	6.25409	6.3789	6.3789	6.3789	6.3789	6.3789	6.22799	6.22799	6.24926	6.31318	6.26679	6.10954	6.30198	6.19189	6.2083	6.25887	6.21014	6.19396	6.17754	6.21014	5.97468	6.04527	6.11665	6.21014	5.88407	5.50818	5.50818	5.92769	5.92769	6.37072	5.90062	6.09978	6.09978	5.50376	5.50376	5.50376	4.57094	4.57293	4.57293
	CaO	11.2502	11.2502	10.9241	10.9241	10.9241	10.9241	10.9241	11.1276	10.9928	10.9928	11.1594	11.1594	11.1594	11.1594	11.1594	11.1382	11.1382	11.072	11.1605	10.7546	10.564	10.7397	11.3377	11.0399	10.8512	11.0577	11.2219	11.1008	11.0577	10.954	10.8741	10.7932	11.0577	10.8875	10.3595	10.3595	10.6259	10.6259	11.0895	10.4264	10.7957	10.7957	10.5254	10.5254	10.5254	9.6086	9.60919	9.60919
	Na2O	2.81125	2.81125	2.86731	2.86731	2.86731	2.86731	2.86731	2.53405	2.58919	2.58919	2.75767	2.75767	2.75767	2.75767	2.75767	2.64963	2.64963	2.69223	2.6044	2.91089	2.93427	3.08185	2.64966	2.65015	2.76868	2.78215	2.76388	2.81374	2.78215	2.80246	2.81963	2.83699	2.78215	2.75451	3.02477	3.02477	2.82217	2.82217	2.7353	2.70814	2.82006	2.82006	2.96002	2.96002	2.96002	2.9487	2.95125	2.95125
	K2O	0.700691	0.700691	0.777094	0.777094	0.777094	0.777094	0.777094	0.74977	0.820456	0.820456	0.724644	0.724644	0.724644	0.724644	0.724644	0.80496	0.80496	0.729656	0.716079	0.73287	0.771692	0.751701	0.755422	0.81633	0.801874	0.799713	0.747196	0.849707	0.799713	0.826226	0.811419	0.796443	0.799713	0.829879	0.902164	0.902164	0.815799	0.815799	0.741014	0.804942	0.838492	0.838492	0.961612	0.961612	0.961612	1.15969	1.15834	1.15834
	P2O5	0.381985	0.381985	0.42313	0.42313	0.42313	0.42313	0.42313	0.319617	0.341975	0.341975	0.380788	0.380788	0.380788	0.380788	0.380788	0.318143	0.318143	0.347594	0.348601	0.361288	0.388059	0.335327	0.365106	0.351982																						0.542189	0.543916	0.543916
	Total	100	100	100	100	100	100	100	100	100	100	100	100	100	100	100	100	100	100	100	100	100	100	100	100	100	100	100	100	100	100	100	100	100	100	100	100	100	100	100	100	100	100	100	100	100	100	100	100
	T (°C)	1164.15	1164.15	1156.08	1156.08	1156.08	1156.08	1156.08	1160.1	1158.88	1158.88	1162.17	1162.17	1162.17	1162.17	1162.17	1158.2	1158.2	1158.76	1160.44	1159.22	1155.08	1160.14	1157.25	1157.68	1159.01	1157.73	1157.3	1156.87	1157.73	1151.53	1153.39	1155.27	1157.73	1149.15	1139.27	1139.27	1150.3	1150.3	1161.95	1149.59	1154.82	1154.82	1139.15	1139.15	1139.15	1114.62	1114.67	1114.67
	H2O (wt%)	0.0995155	-0.0279903	0.627226	0.424292	0.444436	0.693968	0.663821	0.201645	0.15241	0.599527	0.689624	0.50662	0.46699	0.282942	0.411609	0.523066	0.499039	0.048104	0.351919	0.391212	-0.0158725	0.610418	0.196421	0.0408292	0.272476	0.559724	0.365346	0.540081	0.536568	0.458113	0.80779	0.634834	0.113487	0.601915	0.789157	0.822272	0.612041	0.438361	0.482366	0.586262	0.577129	0.613217	0.915084	0.82632	0.786171	0.657769	0.675827	1.1648
	Kd (An-Ab)	0.355854	0.387906	0.271897	0.252545	0.307452	0.25997	0.265221	0.280056	0.353269	0.216138	0.208739	0.285154	0.239583	0.268493	0.248	0.2967	0.246857	0.369172	0.323053	0.296657	0.37907	0.200033	0.355675	0.375266	0.239914	0.217199	0.265703	0.219369	0.220347	0.248274	0.191852	0.204841	0.35658	0.279613	0.204809	0.200696	0.258885	0.23623	0.211672	0.26606	0.264628	0.258339	0.168096	0.177663	0.182174	0.271892	0.268342	0.193279
[truncated: 18 more columns]

## Sheet: TableS5c
	Publication	Di Muro et al. (2015)																										This study																			T
	Eruption	September 2008	September 2008	September 2008	September 2008	September 2008	September 2008	September 2008	September 2008	September 2008	September 2008	September 2008	September 2008	September 2008	September 2008	September 2008	September 2008	September 2008	September 2008	September 2008	September 2008	September 2008	September 2008	September 2008	September 2008	September 2008	September 2008	Décembre 2009	Décembre 2009	Décembre 2009	Décembre 2009	Décembre 2009	Décembre 2009	Décembre 2009	Janvier 2010	Janvier 2010	Janvier 2010	Janvier 2010	Janvier 2010	Janvier 2010	Janvier 2010	Octobre 2010	Octobre 2010	Octobre 2010	Juin 2014	Juin 2014	Juin 2014	Juin 2014	Juin 2014
	Label Plagioclase	drap-pl3	drap-pl1	drap-pl2	drap-pl4	drap-pl4	drap-pl5	drap-pl1	2203-pigna2-pl1	2203-pigna2-pl1	2203-pigna2-pl2	2203-pigna2-pl3	2203-pigna3-pl1-core	211-cap1-pl1	211-cap2-pl1	211-cap2-pl1	211-cap2-pl1	211-cap2-pl1	211-cap2-pl1	211-cap3-pl1	211-cap3-pl1	211-cap4-pl1	2201-cp1-pl1	2201-cp1-pl1	2201-cp2-pl1	2201-cp2-pl1	2201-cp2-pl2	PL1	PL13	PL16	PL12	PL21	PL33	PL40	PL9	PL29	PL29	PL32	PL26	PL38	PL38	PL11	PLX	PLX	REU140624-3-5 zone2 plagio 1	REU140624-3-5 zone2 plagio 2	REU140624-3-5 zone2 plagio 3	REU140624-3-8 plagio1	REU140624-3-8 plagio2
	Zone	Core	Core	Core	Core	Core	Core	Core	Core	Core	Core	Core	Core	Core	Core	Core	Core	Core	Core	Core	Core	Core	Core	Core	Core	Core	Core	Core	Core	Core	Core	Core	Core	Core	Core	Core	Core	Core	Core	Core	Core	Core	Core	Core	Core	Core	Core	Core	Core
	SiO2	50.19	50.892	50.036	49.514	49.853	49.891	50.23	49.877	49.97	50.398	50.674	52.312	49.999	49.38	49.276	49.569	50.343	50.432	53.444	52.458	50.427	49.318	49.71	49.739	49.071	49.665	47.6739	49.276	50.7121	48.182	50.0838	49.8661	49.7088	50.6545	50.8554	50.7572	50.3584	50.3648	49.821	50.3392	52.57	49.9647	49.8705	49.8328	47.9176	52.8231	51.9124	51.5338
	TiO2																																												0.071	0.0529	0.1752	0.1244	0.1296
	Al2O3	31.162	30.713	31.238	31.819	31.322	31.133	30.996	31.31	31.26	31.096	30.941	29.103	31.213	31.799	31.694	31.663	30.778	31.216	28.884	29.445	30.703	31.478	31.615	31.527	32.101	31.649	32.8911	32.1781	31.1981	32.8653	31.6094	31.4264	31.7625	31.233	31.493	31.4824	31.501	31.8222	30.9785	31.8302	28.7103	31.7859	31.6872	30.5267	31.7987	29.41	29.4276	29.7163
	FeO	0.597	0.605	0.57	0.742	0.702	0.633	0.693	0.613	0.737	0.595	0.762	1.025	0.728	0.563	0.644	0.615	0.732	0.674	0.627	0.726	0.648	0.584	0.644	0.642	0.701	0.977	0.6402	0.7216	0.6663	0.5636	0.5711	0.6126	0.6021	0.6781	0.5184	0.5761	0.6672	0.523	0.7128	0.5472	1.1378	0.5471	0.7015	0.7147	0.6574	0.9949	0.6675	0.8907
	MnO																																												0	0.009	0	0	0.0186
	MgO	0.195	0.186	0.176	0.167	0.171	0.197	0.197	0.204	0.173	0.22	0.191	0.319	0.199	0.172	0.165	0.175	0.192	0.196	0.2	0.27	0.197	0.175	0.177	0.191	0.186	0.231																		0.1958	0.1649	0.239	0.2105	0.2325
	CaO	14.512	13.955	14.792	14.909	15.011	14.763	14.45	14.831	14.9	14.287	14.107	13.092	14.51	14.946	15.078	14.834	14.482	14.312	12.148	13.158	14.338	15.167	14.888	14.946	15.443	15.168	16.4811	15.6824	14.6142	16.7383	15.3808	14.8323	15.3886	14.6919	14.9524	14.6416	14.9003	15.111	14.8276	15.0431	12.8244	14.877	15.3942	14.8908	16.0462	13.0156	13.0543	13.9684
	Na2O	3.115	3.29	2.958	2.966	2.934	3.032	3.116	2.938	2.98	3.243	3.298	4.035	3.225	2.639	2.833	3.111	3.208	3.162	4.239	3.991	3.401	2.806	2.882	2.818	2.621	2.857	2.1456	2.644	3.1675	1.9883	2.75	2.867	2.8056	3.0871	3.11	3.025	2.9819	2.8232	3.0502	2.8995	3.908	2.8886	2.7011	2.9779	2.2869	3.8269	3.8465	3.4973
	K2O	0.114	0.13	0.137	0.113	0.104	0.129	0.15	0.08	0.096	0.129	0.145	0.158	0.122	0.101	0.1	0.105	0.104	0.114	0.183	0.152	0.128	0.096	0.099	0.096	0.105	0.084	0.1298	0.0916	0.1427	0.0665	0.1114	0.1363	0.1121	0.1214	0.1398	0.1172	0.1273	0.0923	0.1278	0.1146	0.2332	0.0966	0.1002	0.113	0.0895	0.2003	0.1962	0.167
	Total	99.885	99.771	99.907	100.23	100.097	99.778	99.832	99.853	100.116	99.968	100.118	100.044	99.996	99.6	99.79	100.072	99.839	100.106	99.725	100.2	99.842	99.624	100.015	99.959	100.228	100.631	99.9617	100.594	100.501	100.404	100.506	99.7407	100.38	100.466	101.069	100.599	100.536	100.736	99.5179	100.774	99.3837	100.16	100.455	99.3227	99.0231	100.685	99.4394	100.154
	An	71.5416	69.5544	72.8384	73.0444	73.4241	72.3558	71.2969	73.2652	73.0143	70.3475	69.6719	63.6092	70.8106	75.3257	74.1892	72.0491	70.9517	70.9578	60.6283	63.9945	69.4505	74.4975	73.6257	74.1376	76.0326	74.2144	80.3273	76.2215	71.2381	81.992	75.0702	73.4948	74.71	71.9436	72.0761	72.2908	72.8744	74.3345	72.3368	73.65	63.5741	73.5836	75.4613	72.944	79.0802	64.5004	64.4709	68.1525
	Ab	27.7892	29.6741	26.3583	26.2964	25.9702	26.8914	27.8219	26.2643	26.4256	28.8962	29.4754	35.4768	28.4805	24.0682	25.2249	27.3437	28.4417	28.3693	38.2843	35.1253	29.8112	24.9411	25.7913	25.2954	23.3519	25.2963	18.9179	23.2473	27.9319	17.6193	24.2811	25.6993	24.6406	27.3471	27.1198	27.0188	26.3827	25.1238	26.9193	25.6806	35.0465	25.8463	23.9527	26.397	20.3946	34.3177	34.3754	30.8774
	Or	0.66915	0.771481	0.803233	0.65918	0.605689	0.752793	0.881213	0.470548	0.560119	0.756283	0.852664	0.914025	0.708889	0.606075	0.585847	0.607221	0.606673	0.672964	1.08745	0.880204	0.738217	0.561436	0.582929	0.566986	0.615523	0.489357	0.754852	0.531215	0.829987	0.38868	0.64876	0.80585	0.649375	0.709321	0.804077	0.69045	0.74288	0.541762	0.743926	0.669468	1.37937	0.570102	0.586064	0.659078	0.525177	1.18186	1.15371	0.970149
	Label Bulk	222 (Pelée's hair)	222 (Pelée's hair)	222 (Pelée's hair)	222 (Pelée's hair)	222 (Pelée's hair)	222 (Pelée's hair)	222 (Pelée's hair)	222 (Pelée's hair)	222 (Pelée's hair)	222 (Pelée's hair)	222 (Pelée's hair)	222 (Pelée's hair)	222 (Pelée's hair)	222 (Pelée's hair)	222 (Pelée's hair)	222 (Pelée's hair)	222 (Pelée's hair)	222 (Pelée's hair)	222 (Pelée's hair)	222 (Pelée's hair)	222 (Pelée's hair)	222 (Pelée's hair)	222 (Pelée's hair)	222 (Pelée's hair)	222 (Pelée's hair)	222 (Pelée's hair)	this study	this study	this study	this study	this study	this study	this study	this study	this study	this study	this study	this study	this study	this study	this study	this study	this study	this study	this study	this study	this study	this study
	Number of analysis	1	1	1	1	1	1	1	1	1	1	1	1	1	1	1	1	1	1	1	1	1	1	1	1	1	1	9	9	9	9	9	9	9	3	3	3	3	3	3	3	10	10	10	1	1	1	1	1
	SiO2	50.1928	50.1928	50.1928	50.1928	50.1928	50.1928	50.1928	50.1928	50.1928	50.1928	50.1928	50.1928	50.1928	50.1928	50.1928	50.1928	50.1928	50.1928	50.1928	50.1928	50.1928	50.1928	50.1928	50.1928	50.1928	50.1928	49.7612	49.7612	49.7612	49.7612	49.7612	49.7612	49.7612	49.7421	49.7421	49.7421	49.7421	49.7421	49.7421	49.7421	49.7028	49.7028	49.7028	49.2386	49.2386	49.2386	49.3395	49.3395
	TiO2	2.88208	2.88208	2.88208	2.88208	2.88208	2.88208	2.88208	2.88208	2.88208	2.88208	2.88208	2.88208	2.88208	2.88208	2.88208	2.88208	2.88208	2.88208	2.88208	2.88208	2.88208	2.88208	2.88208	2.88208	2.88208	2.88208	2.78449	2.78449	2.78449	2.78449	2.78449	2.78449	2.78449	2.86646	2.86646	2.86646	2.86646	2.86646	2.86646	2.86646	2.74053	2.74053	2.74053	2.86592	2.86592	2.86592	2.86732	2.86732
	Al2O3	14.5017	14.5017	14.5017	14.5017	14.5017	14.5017	14.5017	14.5017	14.5017	14.5017	14.5017	14.5017	14.5017	14.5017	14.5017	14.5017	14.5017	14.5017	14.5017	14.5017	14.5017	14.5017	14.5017	14.5017	14.5017	14.5017	14.3718	14.3718	14.3718	14.3718	14.3718	14.3718	14.3718	14.4362	14.4362	14.4362	14.4362	14.4362	14.4362	14.4362	14.427	14.427	14.427	14.4722	14.4722	14.4722	14.4692	14.4692
	FeO	10.9093	10.9093	10.9093	10.9093	10.9093	10.9093	10.9093	10.9093	10.9093	10.9093	10.9093	10.9093	10.9093	10.9093	10.9093	10.9093	10.9093	10.9093	10.9093	10.9093	10.9093	10.9093	10.9093	10.9093	10.9093	10.9093	10.9553	10.9553	10.9553	10.9553	10.9553	10.9553	10.9553	11.1394	11.1394	11.1394	11.1394	11.1394	11.1394	11.1394	11.0552	11.0552	11.0552	11.4534	11.4534	11.4534	11.5264	11.5264
	MnO	0.162371	0.162371	0.162371	0.162371	0.162371	0.162371	0.162371	0.162371	0.162371	0.162371	0.162371	0.162371	0.162371	0.162371	0.162371	0.162371	0.162371	0.162371	0.162371	0.162371	0.162371	0.162371	0.162371	0.162371	0.162371	0.162371	0.171058	0.171058	0.171058	0.171058	0.171058	0.171058	0.171058	0.174102	0.174102	0.174102	0.174102	0.174102	0.174102	0.174102	0.172199	0.172199	0.172199	0.173436	0.173436	0.173436	0.174748	0.174748
	MgO	6.47453	6.47453	6.47453	6.47453	6.47453	6.47453	6.47453	6.47453	6.47453	6.47453	6.47453	6.47453	6.47453	6.47453	6.47453	6.47453	6.47453	6.47453	6.47453	6.47453	6.47453	6.47453	6.47453	6.47453	6.47453	6.47453	6.76888	6.76888	6.76888	6.76888	6.76888	6.76888	6.76888	6.57395	6.57395	6.57395	6.57395	6.57395	6.57395	6.57395	6.68726	6.68726	6.68726	6.57151	6.57151	6.57151	6.55499	6.55499
	CaO	11.2036	11.2036	11.2036	11.2036	11.2036	11.2036	11.2036	11.2036	11.2036	11.2036	11.2036	11.2036	11.2036	11.2036	11.2036	11.2036	11.2036	11.2036	11.2036	11.2036	11.2036	11.2036	11.2036	11.2036	11.2036	11.2036	11.4193	11.4193	11.4193	11.4193	11.4193	11.4193	11.4193	11.4382	11.4382	11.4382	11.4382	11.4382	11.4382	11.4382	11.4908	11.4908	11.4908	11.2155	11.2155	11.2155	11.2034	11.2034
	Na2O	2.61823	2.61823	2.61823	2.61823	2.61823	2.61823	2.61823	2.61823	2.61823	2.61823	2.61823	2.61823	2.61823	2.61823	2.61823	2.61823	2.61823	2.61823	2.61823	2.61823	2.61823	2.61823	2.61823	2.61823	2.61823	2.61823	2.75404	2.75404	2.75404	2.75404	2.75404	2.75404	2.75404	2.58688	2.58688	2.58688	2.58688	2.58688	2.58688	2.58688	2.67931	2.67931	2.67931	2.87	2.87	2.87	2.74888	2.74888
	K2O	0.740816	0.740816	0.740816	0.740816	0.740816	0.740816	0.740816	0.740816	0.740816	0.740816	0.740816	0.740816	0.740816	0.740816	0.740816	0.740816	0.740816	0.740816	0.740816	0.740816	0.740816	0.740816	0.740816	0.740816	0.740816	0.740816	0.686298	0.686298	0.686298	0.686298	0.686298	0.686298	0.686298	0.703665	0.703665	0.703665	0.703665	0.703665	0.703665	0.703665	0.705993	0.705993	0.705993	0.758604	0.758604	0.758604	0.739332	0.739332
	P2O5	0.314593	0.314593	0.314593	0.314593	0.314593	0.314593	0.314593	0.314593	0.314593	0.314593	0.314593	0.314593	0.314593	0.314593	0.314593	0.314593	0.314593	0.314593	0.314593	0.314593	0.314593	0.314593	0.314593	0.314593	0.314593	0.314593	0.327676	0.327676	0.327676	0.327676	0.327676	0.327676	0.327676	0.339072	0.339072	0.339072	0.339072	0.339072	0.339072	0.339072	0.338947	0.338947	0.338947	0.38088	0.38088	0.38088	0.37616	0.37616
	Total	100	100	100	100	100	100	100	100	100	100	100	100	100	100	100	100	100	100	100	100	100	100	100	100	100	100	100	100	100	100	100	100	100	100	100	100	100	100	100	100	100	100	100	100	100	100	100	100
	T (°C)	1164.68	1164.68	1164.68	1164.68	1164.68	1164.68	1164.68	1164.68	1164.68	1164.68	1164.68	1164.68	1164.68	1164.68	1164.68	1164.68	1164.68	1164.68	1164.68	1164.68	1164.68	1164.68	1164.68	1164.68	1164.68	1164.68	1172.42	1172.42	1172.42	1172.42	1172.42	1172.42	1172.42	1167.29	1167.29	1167.29	1167.29	1167.29	1167.29	1167.29	1170.27	1170.27	1170.27	1167.23	1167.23	1167.23	1166.8	1166.8
	H2O (wt%)	0.340726	0.201058	0.446614	0.453887	0.166983	0.406779	0.334544	0.459637	0.445691	0.257606	0.213893	-0.198269	0.288876	0.331214	0.230673	0.375162	0.293544	0.297694	-0.381572	-0.174617	0.191819	0.25555	0.182469	0.224957	0.395213	0.226218	0.748846	0.330655	0.251802	0.89465	0.236212	0.110933	0.204678	0.329304	0.344771	0.354408	0.401989	0.19632	0.361016	0.146545	-0.236139	0.120827	0.284598	0.512493	0.743465	-0.0606437	-0.107795	0.134462
	Kd (An-Ab)	0.312744	0.343498	0.291359	0.289855	0.284779	0.299235	0.314186	0.288628	0.291399	0.330722	0.340623	0.44905	0.323832	0.25726	0.273754	0.305562	0.322748	0.321899	0.508412	0.441926	0.345602	0.269554	0.282043	0.274709	0.247282	0.274435	0.183731	0.23794	0.305887	0.167645	0.252332	0.272796	0.257304	0.31777	0.31455	0.312447	0.302648	0.282545	0.311098	0.291491	0.447063	0.284855	0.257416	0.270698	0.192916	0.397993	0.415038	0.352664
[truncated: 5 more columns]
