# Supplementary material for: Integrating field, textural, and geochemical monitoring to track eruption triggers and dynamics: a case study from Piton de la Fournaise
Source: Copernicus journal article supplement (doi:10.5194/se-9-431-2018), 2018-04-16
Supplement: Supplementary file 2 [file se-9-431-2018-supplement.zip › supplement/Table_S6.xlsx]

## Sheet: Olivine-hosted melt inclusions
Label:	REU-2 #MI1	REU-2-#MI2	REU-2 #MI3	REU-2 #MI4A	REU-2 #MI4B	REU-2 #MI5	REU-2 #MI7	REU-2 #MI8	REU-2 #MI9	REU-2 #MI10	REU-2 #MI11	Label:	REU-1 #MI1A	REU-1 #MI1B	REU-1 #MI2	REU-1 #MI3	REU-1 #MI4	REU-1 #MI5	REU-1 #MI6	REU-5 #MI1A	REU-5 #MI1B	REU-5 #MI2	REU-5 #MI3	REU-5 #MI4
Sample:	opaque	opaque	opaque	opaque	opaque	opaque	opaque	opaque	opaque	opaque	opaque	Sample:	fluidal	fluidal	fluidal	fluidal	fluidal	fluidal	fluidal	glassy	glassy	glassy	glassy	glassy
SiO2 (wt %)	50.1023	50.4166	50.0705	48.9662	49.1366	49.1244	49.8766	49.8333	49.709	48.8132	48.4393	SiO2 (wt %)	46.1646	49.2849	49.1228	49.0121	49.6951	50.1134	49.094	49.2528	48.9897	49.4855	49.2145	49.1543
TiO2	2.9875	3.5008	3.251	3.3818	3.2496	3.5552	3.1347	3.1952	3.3558	3.3116	3.4899	TiO2	2.3185	2.4295	2.6966	2.9066	2.94945	2.6651	2.9672	2.8253	2.9233	2.9982	2.869	3.1302
Al2O3	15.5234	15.5772	15.5844	15.0714	15.2228	15.2827	15.6097	15.8822	15.9888	15.267	15.767	Al2O3	14.3926	15.7703	15.4515	15.7019	15.0279	15.3794	14.6641	15.091	15.1052	14.9132	14.8946	15.3223
MnO	0.0854	0.0495	0.1199	0.1472	0.0815	0	0.15135	0.1634	0.10965	0.1606	0.1544	MnO	0.0944	0.2324	0.1213	0.2572	0.15865	0.1564	0.1358	0.2237	0.0246	0.278	0.2085	0.1898
FeOtotal	8.9687	8.542	8.4595	9.5792	8.4382	8.8002	8.75105	8.3203	9.12265	9.1246	8.9708	FeOtotal	10.3406	9.7688	9.6779	8.8002	9.1923	9.5713	8.487	10.2843	11.0238	9.1818	10.4906	8.6687
MgO	4.3778	3.3822	3.8386	5.5809	5.2785	3.779	3.77265	3.6819	3.8931	3.9801	3.6855	MgO	6.7889	5.665	4.9968	4.7639	5.96625	5.6819	5.5743	5.4834	5.0226	6.0049	5.6374	5.5552
CaO	12.7834	13.5817	13.0387	12.3966	12.6965	13.6386	13.7949	12.8267	12.8712	13.3919	13.8851	CaO	12.8895	11.626	13.1199	13.3973	11.5273	11.7884	13.0071	11.4454	11.6606	12.3354	11.1269	13.2002
Na2O	2.542	2.3708	2.6617	2.4342	2.6224	2.3452	2.4078	2.5075	2.6814	2.5941	2.6732	Na2O	2.4012	2.5335	2.6221	2.679	2.7211	2.9264	2.5631	2.7478	2.6066	2.4735	2.80325	2.3144
K2O	0.9572	0.7655	0.9096	0.7557	0.8406	0.8001	0.7188	0.963	0.76885	0.7309	0.752	K2O	0.6468	0.7745	0.7007	0.6964	0.77985	0.6962	0.568	0.7502	0.7207	0.7321	0.76105	0.6857
P2O5	0.4731	0.5297	0.4747	0.3227	0.3392	0.3494	0.40325	0.3975	0.43055	0.4033	0.869	P2O5	2.5266	0.2705	0.4729	0.2038	0.3836	0.4178	0.4322	0.3162	0.3228	0.3026	0.3671	0.4412
Cl (wt %)	0.0408	0.02942	0.0296	0.02526	0.03478	0.02556	0.02946	0.03574	0.0289	0.03108	_	Cl (wt %)	0.02816	0.02702	0.02816	0.03322	0.02609	0.02716	0.01676	0.0242	0.02432	0.02646	0.02629	0.0289
S (wt %)	0.07908	0.10582	0.05166	0.13756	0.10536	0.07066	0.145	0.05792	0.13192	0.1183	_	S (wt %)	0.1244	0.09688	0.11034	0.11558	0.13195	0.08994	0.04876	0.13228	0.12818	0.1121	0.13395	0.11556
Total	98.9207	98.8512	98.4899	98.7987	98.046	97.771	98.7953	97.8647	99.0919	97.9267	98.6862	Total	98.7163	98.4793	99.121	98.5672	98.5595	99.5134	97.5583	98.5766	98.5524	98.8438	98.5331	98.8065
Recalculated composition												Recalculated composition
Fo mol (1)	0.844813	0.838093	0.842023	0.843435	0.843435	0.843842	0.84435	0.841163	0.831235	0.846903	0.838064	Fo mol (1)	0.829785	0.829785	0.830223	0.859774	0.832983	0.833478	0.849723	0.807373	0.807373	0.850837	0.804613	0.84924
PEC (2)	0.0895	0.0973	0.0886	0.0679	0.05	0.0992	0.0995	0.0897	0.0888	0.105	0.09865	PEC (2)	0.0291	0.0502	0.0685	0.1002	0.0324	0.0499	0.0529	0.036	0.0646	0.0595	0.0319	0.057
SiO2 (wt %)	49.152	49.379	49.1605	48.3915	48.7049	48.2276	48.8981	48.8779	48.813	47.9398	47.5694	SiO2 (wt %)	45.9713	48.7948	48.448	48.0412	49.3868	49.6239	48.6107	48.9025	48.3781	48.9504	48.8747	48.635
TiO2	2.7211	3.16153	2.96455	3.15342	3.08804	3.20504	2.82455	2.91093	3.0593	2.96424	3.14755	TiO2	2.25156	2.30845	2.51351	2.61701	2.85434	2.53267	2.81075	2.72392	2.73505	2.82042	2.77838	2.95258
Al2O3	14.1372	14.0648	14.2091	14.0514	14.4641	13.7707	14.0625	14.4611	14.5716	13.6715	14.2157	Al2O3	13.9748	14.9804	14.3956	14.136	14.5418	14.6142	13.8923	14.5493	14.1322	14.029	14.4205	14.4511
MnO	0.097402	0.062256	0.127422	0.148463	0.085715	0.0242544	0.151982	0.171563	0.117487	0.158847	0.15955	MnO	0.0979415	0.231582	0.13078	0.256318	0.159692	0.157388	0.135541	0.227988	0.0451557	0.270693	0.209639	0.19033
FeOtotal	9.48912	9.22217	9.04936	9.95279	8.77036	9.42078	9.36227	8.92118	9.72477	9.71846	9.6103	FeOtotal	10.507	10.0846	10.1078	9.2299	9.41206	9.89255	8.7939	10.5647	11.4792	9.48139	10.7365	8.99377
MgO	8.02654	7.44163	7.50321	8.29655	7.29336	7.9316	7.90129	7.35387	7.44934	8.37814	7.7477	MgO	7.86928	7.58517	7.65226	8.79738	7.22106	7.64138	7.67696	6.81578	7.44325	8.35437	6.79863	7.82716
CaO	11.6644	12.2878	11.9086	11.5744	12.076	12.3139	12.4503	11.7022	11.7538	12.015	12.5433	CaO	12.5229	11.0571	12.2421	12.0812	11.1642	11.2153	12.3341	11.0441	10.9265	11.6185	10.7813	12.4631
Na2O	2.31449	2.14012	2.42734	2.26892	2.49128	2.11256	2.16822	2.28258	2.44437	2.32172	2.40949	Na2O	2.3315	2.40662	2.44249	2.41056	2.63312	2.78317	2.42893	2.64888	2.43821	2.3276	2.71383	2.18248
K2O	0.871531	0.691017	0.829009	0.704388	0.79857	0.72073	0.647279	0.876619	0.700576	0.654156	0.677815	K2O	0.627978	0.73562	0.652702	0.626621	0.754583	0.66146	0.537953	0.723193	0.674143	0.68854	0.736773	0.646615
P2O5	0.430758	0.47816	0.432642	0.300789	0.32224	0.31474	0.363127	0.361844	0.392317	0.360953	0.783273	P2O5	2.45308	0.256921	0.440506	0.183379	0.371171	0.396952	0.409337	0.304817	0.301947	0.284595	0.35539	0.416052
Cl (ppm)	371.484	265.574	269.774	235.448	330.41	230.244	265.287	325.341	263.337	278.166	_	Cl (ppm)	273.405	256.636	262.31	298.914	252.447	258.047	158.734	233.288	227.489	248.856	254.513	272.527
S (ppm)	720.023	955.237	470.829	1282.2	1000.92	636.505	1305.72	527.246	1202.06	1058.79	_	S (ppm)	1207.8	920.166	1027.82	1039.99	1276.75	854.52	461.806	1275.18	1199	1054.3	1296.77	1089.73
(1)Fo mol: forsterite content of the host olivine
(2)PEC: Post-entrapment olivine crystallization, calculated on the basis of the equilibrium with KD=(FeO/MgO)Ol/(FeO/MgO)Liq=0,306 (Fisk et al., 1988) and an average Fe3+/ƩFetotal ratio of 0,11 (Di Muro et al., 2014)
