# Supplementary material for: Integrating field, textural, and geochemical monitoring to track eruption triggers and dynamics: a case study from Piton de la Fournaise
Source: Copernicus journal article supplement (doi:10.5194/se-9-431-2018), 2018-04-16
Supplement: Supplementary file 2 [file Table_S2.xlsx]

## Sheet: Feuil1
Sample	Analysis	Type		Phi unit																			Percentile
			-5	-4.5	-4	-3.5	-3	-2.5	-2	-1.5	-1	-0.5	0	0.5	1	1.5	2	2.5	3	3.5	4	>4,5	F5	F16	F25	F50	F75	F84	F95
REU140624-3	Grain size	Total sample		26.19	16.5812	14.3054	17.1103	12.8812	6.45781	3.20897	1.43869	0.58345	0.280853	0.195691	0.159452	0.134085	0.126837	0.0779141	0.00362391	0.0652304	0.0452989	0.15	-4.90454	-4.69454	-4.52272	-3.74734	-2.96844	-2.61909	-1.77031
REU141118-6	Grain size	Total sample				3.48748	10.734	21.5952	22.3674	18.6423	9.57149	5.07425	2.68137	1.51888	0.899448	0.6958	0.6958	0.509122	0.509122	0.356385	0.313958	0.3479	-3.42955	-2.95882	-2.75044	-2.18295	-1.54899	-1.12527	0.278631
REU140624-9b	Grain size	Scattered clats	35.9951	49.6601	9.69458	4.65025																	-5.43055	-5.27775	-5.15273	-4.85899	-4.60728	-4.51667	-4.01804
REU140624-3	Componentry	Spiny opaque scoria		42.4381	20.4131	16.4535	2.38272	0.393867	0.982043	1.69396	2.05128	3.10559	2.06897	3.94737	0
	Componentry	Spiny glassy scoria		40.9022	40.0066	43.6099	19.0617	21.2407	18.7991	27.3857	37.1795	5.59006	6.89655	6.57895	14.2857
	Componentry	Fluidal scoria		16.127	39.1323	31.8936	32.5109	34.3227	45.174	49.6894	45.3846	69.8758	70.3448	72.3684	59.5238
	Componentry	Golden pumice				7.37175	45.8011	43.9584	34.7082	21.1745	15.3846	20.1863	20.6897	17.1053	26.1905
REU141118-6	Componentry	Spiny opaque scoria				0	13.6232	3.77453	2.08649	2.731	3.5461	5.88235	6.71141	6.25	7.6087
	Componentry	Spiny glassy scoria				17.8042	11.2077	26.4217	35.6601	30.7237	30.1418	4.90196	6.71141	9.375	21.7391
	Componentry	Fluidal scoria				28.7834	44.4444	37.5944	30.7284	41.7843	46.9858	58.8235	55.3691	56.25	41.3043
	Componentry	Golden pumice				53.4125	30.7246	32.2094	31.7906	24.67	20.3901	30.3922	31.2081	28.125	29.3478
REU140624-9b	Componentry	Spiny opaque scoria
	Componentry	Spiny glassy scoria
	Componentry	Fluidal scoria	100	100	100	100
	Componentry	Golden pumice
